# Supplementary material
Source: MDPI journal article supplement (https://www.mdpi.com/2311-5637/9/7/605)
Supplement: s1 [file s1]

Archive with 2 entries (2 files):
- Supplementary File S1.xlsx
- Supplementary File S2.pdf
