# Supplementary material
Source: MDPI journal article supplement (https://www.mdpi.com/2311-5637/9/7/605)
Supplement: s1 [file s1 › Supplementary File S1.xlsx]

## Sheet: Ccel DOP-PCR Library Statistics
C. cellulolyticum H10 Library Trial 1			C. cellulolyticum H10 Library Trial 2			C. cellulolyticum H10 Library Trial 3			Find only Zero values
Genome (Bin)	DOP-PCR Reads		Genome (Bin)	DOP-PCR Reads		Genome (Bin)	DOP-PCR Reads		Genome (Bin)	DOP-PCR Reads		GC Content
-11	2		-137	2		-137	2		-137			0.328334
89	2		363	0		863	0		363	1		0.328668
189	0		863	0		1863	1		863	1		0.331945
289	0		1363	0		2863	5		1363	1		0.331026
389	0		1863	0		3863	3		1863	1		0.329953
489	0		2363	1		4863	1		2363			0.331556
589	0		2863	0		5863	2		2863	1		0.333208
689	0		3363	5		6863	0		3363			0.328197
789	0		3863	3		7863	0		3863			0.327075
889	0		4363	3		8863	0		4363			0.325755
989	0		4863	0		9863	1		4863	1		0.326067
1089	0		5363	1		10863	2		5363			0.324068
1189	0		5863	2		11863	0		5863			0.324468
1289	0		6363	0		12863	0		6363	1		0.321368
1389	0		6863	0		13863	32		6863	1		0.324468
1489	0		7363	0		14863	24		7363	1		0.327267
1589	0		7863	0		15863	54		7863	1		0.324868
1689	0		8363	0		16863	5		8363	1		0.325067
1789	0		8863	0		17863	1		8863	1		0.329067
1889	0		9363	0		18863	10		9363	1		0.334767
1989	0		9863	1		19863	0		9863			0.334167
2089	0		10363	0		20863	2		10363	1		0.337766
2189	0		10863	1		21863	0		10863			0.340666
2289	0		11363	2		22863	3		11363			0.345365
2389	0		11863	0		23863	0		11863	1		0.348365
2489	1		12363	0		24863	3		12363	1		0.344966
2589	1		12863	0		25863	0		12863	1		0.344966
2689	0		13363	0		26863	1		13363	1		0.351965
2789	0		13863	1		27863	6		13863			0.356064
2889	0		14363	32		28863	2		14363			0.361564
2989	0		14863	2		29863	2		14863			0.364264
3089	0		15363	24		30863	0		15363			0.361764
3189	0		15863	53		31863	2		15863			0.358864
3289	0		16363	54		32863	5		16363			0.362464
3389	0		16863	0		33863	1		16863	1		0.361864
3489	0		17363	5		34863	49		17363			0.363064
3589	5		17863	1		35863	3612		17863			0.363464
3689	5		18363	0		36863	1843		18363	1		0.367463
3789	0		18863	10		37863	2		18863			0.364764
3889	0		19363	1		38863	2		19363			0.361364
3989	0		19863	0		39863	8		19863	1		0.359964
4089	3		20363	0		40863	8		20363	1		0.358664
4189	3		20863	2		41863	3		20863			0.355964
4289	0		21363	1		42863	3		21363			0.351065
4389	0		21863	0		43863	2		21863	1		0.352065
4489	0		22363	0		44863	2		22363	1		0.356064
4589	3		22863	3		45863	2		22863			0.356364
4689	3		23363	0		46863	23		23363	1		0.354065
4789	1		23863	0		47863	17		23863	1		0.353665
4889	0		24363	0		48863	625		24363	1		0.351965
4989	0		24863	3		49863	167		24863			0.349865
5089	0		25363	1		50863	311		25363			0.353165
5189	0		25863	0		51863	3		25863	1		0.353465
5289	0		26363	0		52863	638		26363	1		0.353365
5389	0		26863	1		53863	580		26863			0.351665
5489	1		27363	1		54863	53		27363			0.352665
5589	0		27863	1		55863	21		27863			0.355264
5689	0		28363	6		56863	6		28363			0.351865
5789	0		28863	0		57863	7		28863	1		0.353065
5889	1		29363	2		58863	13		29363			0.353365
5989	1		29863	2		59863	5		29863			0.352665
6089	2		30363	0		60863	2		30363	1		0.351765
6189	1		30863	0		61863	3		30863	1		0.350965
6289	0		31363	0		62863	8		31363	1		0.355864
6389	0		31863	1		63863	6		31863			0.354965
6489	0		32363	2		64863	6		32363			0.355164
6589	0		32863	2		65863	1		32863			0.352765
6689	0		33363	5		66863	1		33363			0.357564
6789	0		33863	0		67863	18		33863	1		0.358364
6889	0		34363	1		68863	11		34363			0.358464
6989	0		34863	7		69863	6		34863			0.359964
7089	0		35363	49		70863	2		35363			0.359764
7189	0		35863	3612		71863	1		35863			0.363164
7289	0		36363	1471		72863	14		36363			0.363764
7389	0		36863	1843		73863	6		36863			0.367363
7489	0		37363	3		74863	23		37363			0.363964
7589	0		37863	2		75863	2		37863			0.364664
7689	0		38363	0		76863	1		38363	1		0.365163
7789	0		38863	2		77863	2		38863			0.363464
7889	0		39363	0		78863	10		39363	1		0.363664
7989	0		39863	2		79863	260		39863			0.366963
8089	0		40363	8		80863	2138		40363			0.366263
8189	0		40863	8		81863	1190		40863			0.363864
8289	0		41363	8		82863	1		41363			0.363164
8389	0		41863	0		83863	3		41863	1		0.364164
8489	0		42363	3		84863	8		42363			0.364264
8589	0		42863	3		85863	12		42863			0.366263
8689	0		43363	3		86863	14		43363			0.363864
8789	0		43863	0		87863	0		43863	1		0.363364
8889	0		44363	2		88863	3		44363			0.364364
8989	0		44863	2		89863	444		44863			0.366463
9089	0		45363	0		90863	431		45363	1		0.366063
9189	0		45863	2		91863	8		45863			0.366563
9289	0		46363	0		92863	0		46363	1		0.367563
9389	0		46863	23		93863	2		46863			0.368663
9489	0		47363	23		94863	3		47363			0.366963
9589	0		47863	16		95863	1		47863			0.364964
9689	0		48363	17		96863	2		48363			0.369063
9789	0		48863	625		97863	1		48863			0.368963
9889	0		49363	36		98863	0		49363			0.368163
9989	1		49863	167		99863	4		49863			0.362064
10089	1		50363	4		100863	0		50363			0.365563
10189	1		50863	311		101863	5		50863			0.368463
10289	0		51363	3		102863	19		51363			0.367863
10389	0		51863	3		103863	11		51863			0.367663
10489	0		52363	1		104863	3		52363			0.368963
10589	0		52863	638		105863	5		52863			0.369263
10689	0		53363	9		106863	1		53363			0.369863
10789	0		53863	580		107863	1		53863			0.370463
10889	0		54363	13		108863	6		54363			0.369363
10989	0		54863	4		109863	25		54863			0.370463
11089	1		55363	53		110863	29		55363			0.373563
11189	1		55863	12		111863	16		55863			0.373363
11289	2		56363	21		112863	5		56363			0.376162
11389	2		56863	6		113863	4		56863			0.376362
11489	2		57363	2		114863	1		57363			0.382262
11589	1		57863	1		115863	1		57863			0.385861
11689	2		58363	7		116863	4		58363			0.383862
11789	1		58863	13		117863	0		58863			0.382162
11889	0		59363	2		118863	1		59363			0.385061
11989	0		59863	5		119863	4		59863			0.389461
12089	0		60363	6		120863	2		60363			0.385561
12189	0		60863	2		121863	25		60863			0.383262
12289	0		61363	1		122863	13		61363			0.379062
12389	0		61863	3		123863	1		61863			0.374263
12489	0		62363	3		124863	0		62363			0.371263
12589	0		62863	8		125863	3		62863			0.369863
12689	0		63363	0		126863	10		63363	1		0.368963
12789	0		63863	0		127863	1		63863	1		0.367863
12889	0		64363	6		128863	1		64363			0.369963
12989	0		64863	6		129863	0		64863			0.368263
13089	0		65363	4		130863	1		65363			0.368163
13189	0		65863	0		131863	3		65863	1		0.366463
13289	0		66363	1		132863	3		66363			0.365963
13389	0		66863	1		133863	2		66863			0.363164
13489	0		67363	1		134863	2		67363			0.361464
13589	0		67863	1		135863	3		67863			0.359264
13689	0		68363	18		136863	2		68363			0.355864
13789	0		68863	11		137863	2		68863			0.357664
13889	1		69363	8		138863	3		69363			0.358464
13989	1		69863	6		139863	123		69863			0.360964
14089	0		70363	1		140863	485		70363			0.364764
14189	0		70863	2		141863	185		70863			0.367663
14289	0		71363	0		142863	2		71363	1		0.371763
14389	0		71863	0		143863	2		71863	1		0.375162
14489	3		72363	1		144863	4		72363			0.379662
14589	32		72863	1		145863	2		72863			0.378762
14689	28		73363	14		146863	2		73363			0.377062
14789	0		73863	6		147863	2		73863			0.377962
14889	0		74363	1		148863	3		74363			0.374763
14989	1		74863	23		149863	13		74863			0.371863
15089	2		75363	0		150863	5		75363	1		0.370263
15189	2		75863	1		151863	6		75863			0.372563
15289	1		76363	2		152863	9		76363			0.370163
15389	1		76863	1		153863	2		76863			0.370663
15489	1		77363	1		154863	13		77363			0.367463
15589	6		77863	0		155863	10		77863	1		0.364264
15689	11		78363	2		156863	4		78363			0.364364
15789	24		78863	2		157863	9		78863			0.363564
15889	37		79363	10		158863	5		79363			0.360564
15989	53		79863	8		159863	0		79863			0.354765
16089	27		80363	260		160863	0		80363			0.348765
16189	22		80863	2138		161863	0		80863			0.345665
16289	23		81363	1962		162863	3		81363			0.341666
16389	2		81863	1178		163863	0		81863			0.338666
16489	2		82363	1190		164863	2		82363			0.331767
16589	49		82863	0		165863	6		82863	1		0.330967
16689	54		83363	1		166863	2		83363			0.329467
16789	49		83863	3		167863	1		83863			0.323568
16889	0		84363	1		168863	1		84363			0.320168
16989	0		84863	8		169863	1		84863			0.316968
17089	0		85363	0		170863	1		85363	1		0.315668
17189	0		85863	2		171863	0		85863			0.314969
17289	0		86363	12		172863	10		86363			0.314369
17389	1		86863	14		173863	8		86863			0.312969
17489	1		87363	0		174863	3		87363	1		0.320068
17589	5		87863	0		175863	7		87863	1		0.322168
17689	5		88363	0		176863	10		88363	1		0.324168
17789	1		88863	3		177863	15		88863			0.325967
17889	0		89363	2		178863	5		89363			0.329967
17989	0		89863	444		179863	18		89863			0.334567
18089	0		90363	444		180863	18		90363			0.341066
18189	0		90863	431		181863	2		90863			0.344666
18289	0		91363	1		182863	4		91363			0.348165
18389	0		91863	8		183863	3		91863			0.354265
18489	0		92363	1		184863	2		92363			0.358564
18589	0		92863	0		185863	3		92863	1		0.362964
18689	0		93363	0		186863	1		93363	1		0.364164
18789	8		93863	0		187863	21		93863	1		0.366263
18889	10		94363	2		188863	31		94363			0.368463
18989	10		94863	2		189863	26		94863			0.374063
19089	5		95363	3		190863	12		95363			0.380162
19189	4		95863	1		191863	1		95863			0.382662
19289	0		96363	1		192863	0		96363			0.382962
19389	1		96863	2		193863	5		96863			0.385961
19489	1		97363	1		194863	4		97363			0.383962
19589	1		97863	1		195863	1		97863			0.388561
19689	1		98363	0		196863	1		98363	1		0.388461
19789	0		98863	0		197863	5		98863	1		0.385061
19889	0		99363	0		198863	2		99363	1		0.382662
19989	0		99863	4		199863	11		99863			0.382062
20089	0		100363	4		200863	11		100363			0.382562
20189	0		100863	0		201863	2		100863	1		0.382762
20289	0		101363	0		202863	2		101363	1		0.381962
20389	0		101863	3		203863	1		101863			0.378662
20489	0		102363	5		204863	3		102363			0.377962
20589	0		102863	19		205863	2		102863			0.374763
20689	0		103363	2		206863	5		103363			0.376562
20789	0		103863	3		207863	1		103863			0.379862
20889	0		104363	11		208863	1		104363			0.384862
20989	0		104863	3		209863	0		104863			0.382562
21089	2		105363	3		210863	1		105363			0.380562
21189	2		105863	5		211863	2		105863			0.380162
21289	1		106363	5		212863	1		106363			0.382362
21389	0		106863	1		213863	2		106863			0.382662
21489	0		107363	1		214863	5		107363			0.382562
21589	0		107863	1		215863	7		107863			0.380562
21689	1		108363	1		216863	12		108363			0.381462
21789	1		108863	2		217863	0		108863			0.386861
21889	0		109363	6		218863	0		109363			0.385961
21989	0		109863	25		219863	2		109863			0.385761
22089	0		110363	4		220863	6		110363			0.384062
22189	0		110863	29		221863	29		110863			0.383662
22289	0		111363	2		222863	2		111363			0.385261
22389	0		111863	16		223863	2		111863			0.386861
22489	0		112363	10		224863	13		112363			0.388161
22589	0		112863	5		225863	26		112863			0.391961
22689	0		113363	5		226863	69		113363			0.390461
22789	0		113863	4		227863	6		113863			0.386061
22889	0		114363	1		228863	1		114363			0.380362
22989	2		114863	1		229863	3		114863			0.380662
23089	3		115363	0		230863	103		115363	1		0.379862
23189	1		115863	0		231863	5		115863	1		0.377562
23289	0		116363	1		232863	5		116363			0.376462
23389	0		116863	4		233863	3		116863			0.376662
23489	0		117363	2		234863	10		117363			0.374963
23589	0		117863	0		235863	7		117863	1		0.373063
23689	0		118363	0		236863	8		118363	1		0.371563
23789	0		118863	1		237863	2		118863			0.371263
23889	0		119363	1		238863	2		119363			0.375062
23989	0		119863	0		239863	53		119863	1		0.373063
24089	0		120363	4		240863	35		120363			0.373463
24189	0		120863	2		241863	8		120863			0.371663
24289	0		121363	2		242863	149		121363			0.371563
24389	0		121863	25		243863	65		121863			0.369263
24489	0		122363	0		244863	59		122363	1		0.371363
24589	0		122863	2		245863	0		122863			0.369963
24689	0		123363	13		246863	2		123363			0.368063
24789	0		123863	1		247863	1		123863			0.370163
24889	3		124363	0		248863	3		124363	1		0.373563
24989	3		124863	0		249863	2		124863	1		0.372763
25089	0		125363	0		250863	50		125363	1		0.371063
25189	0		125863	2		251863	28		125863			0.373463
25289	1		126363	3		252863	10		126363			0.373063
25389	1		126863	10		253863	5		126863			0.371163
25489	0		127363	6		254863	1		127363			0.370863
25589	0		127863	1		255863	155		127863			0.369563
25689	0		128363	0		256863	155		128363	1		0.370063
25789	0		128863	1		257863	1		128863			0.368463
25889	0		129363	1		258863	0		129363			0.365663
25989	0		129863	0		259863	4		129863	1		0.368963
26089	0		130363	0		260863	12		130363	1		0.365863
26189	0		130863	0		261863	17		130863	1		0.366963
26289	0		131363	1		262863	331		131363			0.365663
26389	0		131863	1		263863	241		131863			0.369163
26489	0		132363	3		264863	18		132363			0.367963
26589	0		132863	1		265863	1		132863			0.369263
26689	0		133363	3		266863	0		133363			0.373063
26789	0		133863	0		267863	6		133863	1		0.375662
26889	1		134363	2		268863	5		134363			0.374563
26989	1		134863	2		269863	1		134863			0.379362
27089	0		135363	0		270863	1		135363	1		0.379862
27189	0		135863	0		271863	3		135863	1		0.375862
27289	1		136363	3		272863	3		136363			0.378962
27389	1		136863	1		273863	12		136863			0.382362
27489	0		137363	2		274863	49		137363			0.385161
27589	0		137863	0		275863	81		137863	1		0.390661
27689	0		138363	2		276863	6		138363			0.394061
27789	0		138863	1		277863	0		138863			0.394361
27889	1		139363	3		278863	1		139363			0.39566
27989	1		139863	123		279863	1		139863			0.392961
28089	0		140363	123		280863	5		140363			0.391861
28189	0		140863	485		281863	7		140863			0.393361
28289	2		141363	416		282863	5		141363			0.394161
28389	6		141863	185		283863	2		141863			0.392461
28489	5		142363	184		284863	4		142363			0.393661
28589	1		142863	2		285863	2		142863			0.394861
28689	0		143363	1		286863	2		143363			0.39636
28789	0		143863	0		287863	6		143863	1		0.39596
28889	0		144363	2		288863	4		144363			0.394861
28989	0		144863	1		289863	2		144863			0.389561
29089	0		145363	4		290863	2		145363			0.391561
29189	0		145863	1		291863	1		145863			0.393061
29289	0		146363	2		292863	22		146363			0.391961
29389	1		146863	2		293863	8		146863			0.390361
29489	2		147363	1		294863	2		147363			0.384762
29589	2		147863	2		295863	19		147863			0.382062
29689	0		148363	2		296863	12		148363			0.378062
29789	0		148863	3		297863	15		148863			0.377762
29889	0		149363	3		298863	75		149363			0.378962
29989	1		149863	13		299863	21		149863			0.378562
30089	2		150363	13		300863	159		150363			0.380962
30189	0		150863	1		301863	2		150863			0.379162
30289	0		151363	5		302863	2		151363			0.380362
30389	0		151863	4		303863	2		151863			0.378962
30489	0		152363	6		304863	3		152363			0.377362
30589	0		152863	1		305863	4		152863			0.376462
30689	0		153363	9		306863	3		153363			0.374763
30789	0		153863	2		307863	0		153863			0.378562
30889	0		154363	0		308863	2		154363	1		0.382262
30989	0		154863	3		309863	2		154863			0.385161
31089	0		155363	13		310863	6		155363			0.381562
31189	0		155863	10		311863	5		155863			0.378462
31289	0		156363	4		312863	82		156363			0.373763
31389	0		156863	2		313863	99		156863			0.369863
31489	0		157363	4		314863	4		157363			0.367863
31589	0		157863	2		315863	0		157863			0.364764
31689	0		158363	9		316863	8		158363			0.367463
31789	0		158863	5		317863	12		158863			0.365463
31889	0		159363	5		318863	2		159363			0.363664
31989	1		159863	0		319863	3		159863	1		0.365563
32089	1		160363	0		320863	10		160363	1		0.367063
32189	0		160863	0		321863	2		160863	1		0.367263
32289	2		161363	0		322863	55		161363	1		0.364664
32389	2		161863	0		323863	618		161863	1		0.365363
32489	0		162363	0		324863	563		162363	1		0.364264
32589	0		162863	3		325863	69		162863			0.363664
32689	0		163363	0		326863	64		163363	1		0.362964
32789	2		163863	0		327863	1		163863	1		0.357964
32889	2		164363	0		328863	1		164363	1		0.354265
32989	0		164863	2		329863	2599		164863			0.352965
33089	0		165363	2		330863	26		165363			0.353465
33189	0		165863	3		331863	1708		165863			0.355064
33289	0		166363	6		332863	1		166363			0.356464
33389	0		166863	2		333863	0		166863			0.356964
33489	0		167363	1		334863	0		167363			0.358864
33589	5		167863	1		335863	0		167863			0.361564
33689	5		168363	0		336863	11		168363	1		0.360264
33789	0		168863	1		337863	7		168863			0.364364
33889	0		169363	1		338863	221		169363			0.363864
33989	0		169863	0		339863	25		169863	1		0.362664
34089	0		170363	1		340863	203		170363			0.360264
34189	0		170863	1		341863	1		170863			0.358564
34289	0		171363	0		342863	2		171363	1		0.359764
34389	0		171863	0		343863	2		171863	1		0.360764
34489	1		172363	0		344863	6		172363	1		0.361664
34589	1		172863	1		345863	1		172863			0.359764
34689	0		173363	10		346863	1		173363			0.359564
34789	0		173863	8		347863	7		173863			0.362064
34889	0		174363	2		348863	11		174363			0.366063
34989	0		174863	3		349863	21		174863			0.365963
35089	0		175363	1		350863	14		175363			0.370463
35189	6		175863	1		351863	24		175863			0.372963
35289	7		176363	7		352863	5		176363			0.375962
35389	23		176863	3		353863	2		176863			0.377862
35489	23		177363	10		354863	2		177363			0.382262
35589	19		177863	9		355863	0		177863			0.384262
35689	48		178363	15		356863	0		178363			0.386361
35789	49		178863	5		357863	3		178863			0.382762
35889	661		179363	3		358863	3		179363			0.385061
35989	667		179863	3		359863	44		179863			0.384562
36089	3611		180363	18		360863	43		180363			0.386161
36189	3612		180863	18		361863	42		180863			0.388961
36289	3134		181363	2		362863	20		181363			0.390361
36389	36		181863	1		363863	89		181863			0.391761
36489	32		182363	2		364863	0		182363			0.393261
36589	1189		182863	4		365863	20		182863			0.393761
36689	1472		183363	4		366863	7		183363			0.390561
36789	265		183863	3		367863	16		183863			0.389761
36889	1816		184363	2		368863	26		184363			0.389661
36989	1843		184863	1		369863	0		184863			0.391361
37089	288		185363	2		370863	0		185363			0.387561
37189	294		185863	3		371863	0		185863			0.383062
37289	0		186363	1		372863	97		186363			0.382762
37389	0		186863	1		373863	24		186863			0.377662
37489	1		187363	1		374863	124		187363			0.374163
37589	3		187863	1		375863	2		187863			0.372063
37689	0		188363	21		376863	7		188363			0.372063
37789	0		188863	31		377863	10		188863			0.370963
37889	0		189363	21		378863	5		189363			0.370563
37989	2		189863	26		379863	8		189863			0.368163
38089	2		190363	2		380863	10		190363			0.369663
38189	0		190863	12		381863	11		190863			0.368563
38289	0		191363	0		382863	66		191363	1		0.367063
38389	0		191863	1		383863	68		191863			0.364164
38489	0		192363	1		384863	4		192363			0.362564
38589	0		192863	0		385863	9		192863	1		0.363264
38689	0		193363	0		386863	7		193363	1		0.368263
38789	0		193863	5		387863	31		193863			0.369163
38889	1		194363	1		388863	3		194363			0.367863
38989	2		194863	4		389863	10		194863			0.366263
39089	2		195363	3		390863	40		195363			0.368263
39189	0		195863	1		391863	36		195863			0.371863
39289	0		196363	0		392863	11		196363	1		0.371263
39389	0		196863	0		393863	9		196863	1		0.380462
39489	0		197363	1		394863	14		197363			0.386061
39589	0		197863	5		395863	53		197863			0.388961
39689	0		198363	5		396863	94		198363			0.386061
39789	0		198863	2		397863	2		198863			0.389461
39889	2		199363	0		398863	4		199363	1		0.387761
39989	2		199863	1		399863	65		199863			0.391661
40089	1		200363	11		400863	50		200363			0.388861
40189	0		200863	11		401863	6		200863			0.383262
40289	0		201363	7		402863	5		201363			0.380962
40389	0		201863	1		403863	2		201863			0.376762
40489	0		202363	2		404863	1		202363			0.377462
40589	0		202863	2		405863	2		202863			0.377962
40689	8		203363	0		406863	7		203363	1		0.378562
40789	7		203863	1		407863	27		203863			0.375562
40889	0		204363	0		408863	27		204363	1		0.373063
40989	0		204863	3		409863	20		204863			0.372863
41089	1		205363	0		410863	15		205363	1		0.367463
41189	5		205863	0		411863	11		205863	1		0.368063
41289	8		206363	2		412863	13		206363			0.366663
41389	8		206863	5		413863	4		206863			0.359564
41489	0		207363	2		414863	4		207363			0.352865
41589	0		207863	1		415863	8		207863			0.347065
41689	0		208363	1		416863	9		208363			0.345065
41789	0		208863	0		417863	6		208863	1		0.347465
41889	0		209363	1		418863	19		209363			0.351965
41989	0		209863	0		419863	4		209863	1		0.355064
42089	0		210363	0		420863	0		210363	1		0.357264
42189	0		210863	1		421863	9		210863			0.368663
42289	0		211363	1		422863	22		211363			0.373663
42389	0		211863	2		423863	5		211863			0.375762
42489	0		212363	0		424863	186		212363	1		0.375162
42589	0		212863	0		425863	192		212863	1		0.373263
42689	1		213363	1		426863	2		213363			0.367863
42789	3		213863	1		427863	1		213863			0.369163
42889	3		214363	2		428863	1		214363			0.370563
42989	0		214863	3		429863	15		214863			0.371163
43089	0		215363	5		430863	18		215363			0.373563
43189	3		215863	7		431863	8		215863			0.373963
43289	3		216363	0		432863	9		216363	1		0.375662
43389	1		216863	2		433863	2		216863			0.376362
43489	0		217363	12		434863	3		217363			0.378562
43589	0		217863	0		435863	4		217863	1		0.384262
43689	0		218363	0		436863	2		218363	1		0.388461
43789	0		218863	0		437863	6		218863	1		0.384662
43889	0		219363	0		438863	7		219363	1		0.380562
43989	0		219863	1		439863	1		219863			0.373963
44089	0		220363	2		440863	3		220363			0.374263
44189	0		220863	6		441863	4		220863			0.370563
44289	1		221363	0		442863	1		221363	1		0.367263
44389	1		221863	11		443863	2		221863			0.368463
44489	1		222363	29		444863	0		222363			0.368263
44589	0		222863	2		445863	0		222863			0.369863
44689	0		223363	1		446863	0		223363			0.374263
44789	2		223863	2		447863	0		223863			0.376862
44889	2		224363	1		448863	189		224363			0.378062
44989	1		224863	13		449863	76		224863			0.383262
45089	0		225363	4		450863	10		225363			0.382662
45189	0		225863	26		451863	2		225863			0.381462
45289	0		226363	7		452863	1		226363			0.377262
45389	0		226863	42		453863	7		226863			0.379962
45489	0		227363	69		454863	56		227363			0.383362
45589	0		227863	6		455863	5		227863			0.381362
45689	0		228363	3		456863	0		228363			0.379262
45789	0		228863	1		457863	0		228863			0.379062
45889	0		229363	1		458863	2		229363			0.377962
45989	2		229863	1		459863	33		229863			0.379462
46089	2		230363	3		460863	50		230363			0.375562
46189	1		230863	103		461863	1		230863			0.375662
46289	0		231363	45		462863	1		231363			0.378862
46389	0		231863	5		463863	2		231863			0.377762
46489	0		232363	3		464863	1		232363			0.380862
46589	0		232863	5		465863	4		232863			0.380962
46689	0		233363	0		466863	6		233363	1		0.381262
46789	0		233863	3		467863	8		233863			0.378662
46889	0		234363	3		468863	18		234363			0.371863
46989	0		234863	2		469863	1		234863			0.367563
47089	1		235363	10		470863	1		235363			0.371963
47189	0		235863	3		471863	5		235863			0.376062
47289	23		236363	7		472863	6		236363			0.379962
47389	23		236863	8		473863	1		236863			0.378662
47489	1		237363	7		474863	3		237363			0.376762
47589	0		237863	0		475863	8		237863	1		0.376662
47689	0		238363	2		476863	40		238363			0.380062
47789	0		238863	2		477863	141		238863			0.379562
47889	0		239363	1		478863	64		239363			0.382862
47989	1		239863	2		479863	7		239863			0.386561
48089	1		240363	53		480863	9		240363			0.390461
48189	15		240863	7		481863	9		240863			0.386761
48289	16		241363	35		482863	24		241363			0.382862
48389	0		241863	8		483863	10		241863			0.381762
48489	14		242363	4		484863	6		242363			0.375062
48589	17		242863	149		485863	10		242863			0.372463
48689	16		243363	6		486863	36		243363			0.369163
48789	4		243863	8		487863	5		243863			0.367063
48889	12		244363	65		488863	57		244363			0.371263
48989	13		244863	54		489863	3		244863			0.373563
49089	1		245363	59		490863	1		245363			0.372363
49189	625		245863	0		491863	2		245863	1		0.369963
49289	615		246363	0		492863	8		246363	1		0.368763
49389	25		246863	2		493863	14		246863			0.370863
49489	25		247363	2		494863	6		247363			0.369363
49589	32		247863	1		495863	24		247863			0.366963
49689	36		248363	0		496863	130		248363	1		0.364164
49789	4		248863	0		497863	8		248863	1		0.364764
49889	65		249363	3		498863	15		249363			0.362964
49989	122		249863	2		499863	17		249863			0.359164
50089	167		250363	2		500863	86		250363			0.357164
50189	166		250863	50		501863	86		250863			0.357464
50289	4		251363	46		502863	33		251363			0.354765
50389	4		251863	16		503863	7		251863			0.357164
50489	2		252363	28		504863	5		252363			0.359164
50589	1		252863	0		505863	2		252863	1		0.356864
50689	1		253363	10		506863	2		253363			0.357364
50789	1		253863	5		507863	18		253863			0.356364
50889	308		254363	5		508863	26		254363			0.355564
50989	311		254863	1		509863	43		254863			0.353065
51089	2		255363	1		510863	1		255363			0.348665
51189	1		255863	119		511863	7		255863			0.350165
51289	1		256363	155		512863	22		256363			0.353465
51389	0		256863	155		513863	17		256863			0.356364
51489	0		257363	0		514863	12		257363	1		0.360164
51589	0		257863	1		515863	15		257863			0.361664
51689	2		258363	1		516863	15		258363			0.359564
51789	3		258863	0		517863	10		258863	1		0.364564
51889	1		259363	0		518863	2		259363	1		0.365563
51989	0		259863	0		519863	1		259863	1		0.367263
52089	0		260363	4		520863	2		260363			0.370663
52189	0		260863	4		521863	6		260863			0.371963
52289	0		261363	12		522863	6		261363			0.375162
52389	0		261863	13		523863	10		261863			0.373663
52489	0		262363	17		524863	16		262363			0.376462
52589	0		262863	1		525863	2		262863			0.378062
52689	1		263363	331		526863	13		263363			0.379262
52789	1		263863	136		527863	1		263863			0.382562
52889	4		264363	241		528863	1		264363			0.386661
52989	4		264863	8		529863	11		264863			0.385861
53089	382		265363	18		530863	68		265363			0.387861
53189	638		265863	1		531863	94		265863			0.383862
53289	615		266363	0		532863	6		266363	1		0.382362
53389	9		266863	0		533863	2		266863	1		0.380462
53489	8		267363	0		534863	4		267363	1		0.380162
53589	2		267863	0		535863	3		267863	1		0.381262
53689	0		268363	6		536863	7		268363			0.386161
53789	1		268863	5		537863	13		268863			0.384362
53889	1		269363	5		538863	8		269363			0.381562
53989	0		269863	0		539863	70		269863	1		0.379862
54089	525		270363	1		540863	67		270363			0.379362
54189	580		270863	0		541863	3		270863	1		0.379262
54289	580		271363	1		542863	2		271363			0.379862
54389	13		271863	3		543863	5		271863			0.384962
54489	0		272363	1		544863	6		272363			0.383062
54589	0		272863	2		545863	6		272863			0.386061
54689	0		273363	3		546863	2		273363			0.384262
54789	0		273863	12		547863	5		273863			0.384462
54889	0		274363	6		548863	28		274363			0.382262
54989	0		274863	49		549863	38		274863			0.382162
55089	3		275363	47		550863	2		275363			0.386361
55189	4		275863	80		551863	2		275863			0.384862
55289	3		276363	81		552863	13		276363			0.388561
55389	0		276863	3		553863	22		276863			0.386061
55489	0		277363	6		554863	2		277363			0.384062
55589	53		277863	0		555863	4		277863	1		0.382062
55689	51		278363	0		556863	8		278363	1		0.375462
55789	2		278863	1		557863	4		278863			0.373463
55889	0		279363	0		558863	14		279363	1		0.371263
55989	11		279863	1		559863	6		279863			0.371963
56089	12		280363	1		560863	2		280363			0.367563
56189	2		280863	5		561863	6		280863			0.370463
56289	2		281363	1		562863	7		281363			0.371563
56389	20		281863	3		563863	2		281863			0.371863
56489	21		282363	7		564863	4		282363			0.374863
56589	15		282863	0		565863	2		282863	1		0.376962
56689	0		283363	5		566863	1		283363			0.380862
56789	0		283863	2		567863	1		283863			0.379462
56889	1		284363	1		568863	115		284363			0.381162
56989	1		284863	4		569863	173		284863			0.383362
57089	6		285363	0		570863	92		285363	1		0.382962
57189	6		285863	2		571863	19		285863			0.385661
57289	0		286363	2		572863	8		286363			0.383262
57389	2		286863	2		573863	3		286863			0.386261
57489	2		287363	2		574863	6		287363			0.388061
57589	0		287863	2		575863	0		287863			0.390061
57689	0		288363	6		576863	2		288363			0.39516
57789	1		288863	1		577863	2		288863			0.39566
57889	1		289363	4		578863	5		289363			0.39886
57989	0		289863	2		579863	8		289863			0.39616
58089	1		290363	1		580863	8		290363			0.39566
58189	1		290863	2		581863	1		290863			0.391061
58289	1		291363	1		582863	1		291363			0.387861
58389	1		291863	1		583863	66		291863			0.385761
58489	7		292363	1		584863	51		292363			0.382662
58589	7		292863	3		585863	0		292863			0.383362
58689	1		293363	22		586863	1		293363			0.383862
58789	4		293863	8		587863	0		293863			0.385761
58889	13		294363	3		588863	1		294363			0.385861
58989	13		294863	1		589863	0		294863			0.384762
59089	0		295363	2		590863	12		295363			0.384662
59189	3		295863	18		591863	39		295863			0.388361
59289	3		296363	19		592863	71		296363			0.385461
59389	2		296863	10		593863	6		296863			0.382862
59489	2		297363	12		594863	3		297363			0.382062
59589	2		297863	15		595863	2		297863			0.381962
59689	2		298363	4		596863	1		298363			0.381562
59789	2		298863	2		597863	5		298863			0.380262
59889	1		299363	75		598863	5		299363			0.380762
59989	1		299863	21		599863	1		299863			0.384662
60089	1		300363	12		600863	1		300363			0.389061
60189	3		300863	159		601863	3		300863			0.389661
60289	5		301363	3		602863	0		301363			0.393761
60389	6		301863	2		603863	2		301863			0.393761
60489	2		302363	0		604863	32		302363	1		0.39506
60589	4		302863	2		605863	1		302863			0.39526
60689	4		303363	2		606863	10		303363			0.392861
60789	0		303863	1		607863	1		303863			0.392061
60889	2		304363	2		608863	0		304363			0.392061
60989	2		304863	1		609863	4		304863			0.392961
61089	0		305363	3		610863	27		305363			0.389961
61189	0		305863	3		611863	16		305863			0.387861
61289	0		306363	4		612863	2		306363			0.386661
61389	0		306863	3		613863	4		306863			0.387661
61489	0		307363	1		614863	5		307363			0.388661
61589	1		307863	0		615863	3		307863	1		0.388561
61689	1		308363	0		616863	53		308363	1		0.389561
61789	0		308863	2		617863	28		308863			0.392261
61889	3		309363	1		618863	3		309363			0.394261
61989	3		309863	1		619863	2		309863			0.39596
62089	0		310363	2		620863	4		310363			0.39606
62189	0		310863	3		621863	2		310863			0.39956
62289	0		311363	6		622863	1		311363			0.39956
62389	3		311863	4		623863	0		311863			0.39656
62489	3		312363	5		624863	0		312363			0.394761
62589	0		312863	82		625863	0		312863			0.391161
62689	0		313363	10		626863	1		313363			0.394661
62789	0		313863	99		627863	0		313863			0.39766
62889	8		314363	2		628863	2		314363			0.394261
62989	8		314863	0		629863	6		314863	1		0.39586
63089	0		315363	4		630863	3		315363			0.394261
63189	0		315863	0		631863	2		315863	1		0.394261
63289	0		316363	0		632863	1		316363	1		0.394161
63389	0		316863	0		633863	0		316863	1		0.39596
63489	0		317363	8		634863	19		317363			0.394861
63589	0		317863	12		635863	70		317863			0.394461
63689	0		318363	3		636863	0		318363			0.393361
63789	0		318863	2		637863	0		318863			0.391961
63889	0		319363	2		638863	5		319363			0.392561
63989	0		319863	0		639863	4		319863	1		0.393261
64089	0		320363	3		640863	3		320363			0.393361
64189	0		320863	2		641863	0		320863			0.387361
64289	0		321363	10		642863	7		321363			0.387061
64389	0		321863	2		643863	14		321863			0.390061
64489	6		322363	0		644863	11		322363	1		0.390661
64589	6		322863	1		645863	19		322863			0.386661
64689	0		323363	55		646863	33		323363			0.384662
64789	0		323863	618		647863	0		323863			0.383962
64889	1		324363	17		648863	0		324363			0.385861
64989	6		324863	563		649863	1		324863			0.383462
65089	6		325363	0		650863	3		325363	1		0.388361
65189	6		325863	69		651863	3		325863			0.386361
65289	0		326363	11		652863	118		326363			0.388661
65389	0		326863	64		653863	80		326863			0.387861
65489	4		327363	0		654863	9		327363	1		0.387161
65589	4		327863	0		655863	2		327863	1		0.388061
65689	0		328363	1		656863	15		328363			0.389061
65789	0		328863	1		657863	0		328863			0.384262
65889	0		329363	0		658863	0		329363	1		0.380462
65989	0		329863	7		659863	3		329863			0.379862
66089	0		330363	2599		660863	0		330363			0.379262
66189	0		330863	6		661863	0		330863			0.379462
66289	0		331363	26		662863	1		331363			0.375262
66389	0		331863	1708		663863	1		331863			0.374663
66489	0		332363	1		664863	0		332363			0.375062
66589	1		332863	1		665863	0		332863			0.380562
66689	1		333363	0		666863	35		333363	1		0.381662
66789	0		333863	0		667863	18		333863	1		0.380262
66889	0		334363	0		668863	7		334363	1		0.382562
66989	0		334863	0		669863	2		334863	1		0.382962
67089	0		335363	0		670863	2		335363	1		0.377262
67189	1		335863	0		671863	0		335863	1		0.378562
67289	1		336363	0		672863	4		336363	1		0.376662
67389	0		336863	11		673863	0		336863			0.374063
67489	0		337363	6		674863	4		337363			0.371463
67589	0		337863	5		675863	8		337863			0.370163
67689	0		338363	7		676863	6		338363			0.369963
67789	0		338863	40		677863	6		338863			0.375462
67889	0		339363	221		678863	8		339363			0.375862
67989	0		339863	25		679863	1		339863			0.371763
68089	1		340363	8		680863	4		340363			0.369463
68189	0		340863	9		681863	4		340863			0.372363
68289	0		341363	203		682863	2		341363			0.371663
68389	0		341863	0		683863	106		341863	1		0.371963
68489	12		342363	1		684863	48		342363			0.372663
68589	18		342863	0		685863	6		342863	1		0.371763
68689	14		343363	2		686863	6		343363			0.366063
68789	4		343863	2		687863	0		343863			0.369263
68889	4		344363	0		688863	2		344363	1		0.367363
68989	0		344863	0		689863	1		344863	1		0.371963
69089	0		345363	6		690863	0		345363			0.377062
69189	11		345863	1		691863	2		345863			0.379062
69289	11		346363	1		692863	2		346363			0.381062
69389	4		346863	1		693863	0		346863			0.383462
69489	0		347363	1		694863	7		347363			0.389161
69589	5		347863	3		695863	61		347863			0.391861
69689	5		348363	7		696863	44		348363			0.391261
69789	0		348863	10		697863	0		348863			0.386161
69889	1		349363	11		698863	11		349363			0.387861
69989	2		349863	13		699863	7		349863			0.390461
70089	3		350363	21		700863	1		350363			0.393061
70189	6		350863	3		701863	0		350863			0.39506
70289	4		351363	14		702863	3		351363			0.39536
70389	0		351863	24		703863	2		351863			0.394161
70489	0		352363	23		704863	112		352363			0.392061
70589	0		352863	4		705863	408		352863			0.387761
70689	1		353363	5		706863	581		353363			0.393361
70789	1		353863	2		707863	34		353863			0.387961
70889	0		354363	2		708863	49		354363			0.389561
70989	0		354863	0		709863	10		354863	1		0.386761
71089	2		355363	2		710863	4		355363			0.386661
71189	2		355863	0		711863	8		355863	1		0.387061
71289	0		356363	0		712863	8		356363	1		0.386261
71389	0		356863	0		713863	25		356863	1		0.384962
71489	0		357363	0		714863	22		357363	1		0.384262
71589	0		357863	3		715863	4		357863			0.384962
71689	0		358363	2		716863	0		358363			0.384262
71789	0		358863	3		717863	1		358863			0.389761
71889	0		359363	3		718863	11		359363			0.391161
71989	0		359863	4		719863	3		359863			0.392861
72089	0		360363	44		720863	3		360363			0.390261
72189	0		360863	43		721863	7		360863			0.390361
72289	0		361363	4		722863	1		361363			0.392561
72389	0		361863	42		723863	1		361863			0.39576
72489	0		362363	34		724863	6		362363			0.39786
72589	0		362863	13		725863	5		362863			0.40186
72689	0		363363	20		726863	7		363363			0.40166
72789	1		363863	64		727863	8		363863			0.405259
72889	1		364363	89		728863	7		364363			0.406259
72989	0		364863	0		729863	7223		364863	1		0.406259
73089	0		365363	0		730863	6137		365363	1		0.40286
73189	0		365863	0		731863	0		365863	1		0.39886
73289	0		366363	20		732863	22		366363			0.39646
73389	8		366863	7		733863	387		366863			0.39736
73489	14		367363	5		734863	370		367363			0.392061
73589	8		367863	16		735863	1		367863			0.390461
73689	8		368363	13		736863	2		368363			0.390061
73789	0		368863	3		737863	1		368863			0.390861
73889	6		369363	26		738863	1		369363			0.388761
73989	4		369863	0		739863	3		369863	1		0.386861
74089	0		370363	0		740863	1		370363	1		0.384562
74189	1		370863	0		741863	4		370863	1		0.383462
74289	1		371363	0		742863	8		371363	1		0.385261
74389	0		371863	0		743863	8		371863	1		0.384362
74489	1		372363	0		744863	5		372363	1		0.383962
74589	1		372863	97		745863	3		372863			0.386261
74689	0		373363	12		746863	1		373363			0.387061
74789	23		373863	24		747863	1		373863			0.387161
74889	23		374363	2		748863	5		374363			0.388161
74989	23		374863	124		749863	34		374863			0.386461
75089	0		375363	7		750863	36		375363			0.383462
75189	0		375863	2		751863	4		375863			0.381562
75289	0		376363	2		752863	6		376363			0.383962
75389	0		376863	3		753863	44		376863			0.379562
75489	0		377363	7		754863	44		377363			0.379562
75589	0		377863	8		755863	1		377863			0.374863
75689	0		378363	10		756863	0		378363			0.376962
75789	0		378863	5		757863	1		378863			0.375562
75889	0		379363	4		758863	3		379363			0.374863
75989	1		379863	8		759863	1		379863			0.374363
76089	1		380363	8		760863	0		380363			0.378162
76189	0		380863	1		761863	3		380863			0.378862
76289	0		381363	10		762863	4		381363			0.376962
76389	0		381863	0		763863	1		381863	1		0.375062
76489	0		382363	11		764863	25		382363			0.376862
76589	0		382863	66		765863	2		382863			0.377462
76689	1		383363	18		766863	3		383363			0.375062
76789	2		383863	68		767863	47		383863			0.375362
76889	1		384363	5		768863	39		384363			0.374963
76989	1		384863	4		769863	37		384863			0.371663
77089	1		385363	3		770863	1		385363			0.376462
77189	0		385863	9		771863	1		385863			0.379462
77289	0		386363	0		772863	3		386363	1		0.379362
77389	0		386863	0		773863	26		386863	1		0.384962
77489	0		387363	7		774863	26		387363			0.388661
77589	1		387863	5		775863	1		387863			0.389061
77689	1		388363	31		776863	5		388363			0.386161
77789	1		388863	3		777863	359		388863			0.382662
77889	0		389363	2		778863	112		389363			0.383362
77989	0		389863	10		779863	547		389863			0.383562
78089	0		390363	4		780863	1		390363			0.383362
78189	0		390863	40		781863	1		390863			0.382362
78289	0		391363	2		782863	2		391363			0.382062
78389	0		391863	3		783863	0		391863			0.381162
78489	0		392363	36		784863	0		392363			0.377662
78589	1		392863	0		785863	15		392863	1		0.374163
78689	1		393363	11		786863	6		393363			0.374063
78789	2		393863	9		787863	6		393863			0.373163
78889	2		394363	5		788863	1		394363			0.371763
78989	0		394863	14		789863	0		394863			0.373863
79089	1		395363	14		790863	3		395363			0.373763
79189	2		395863	7		791863	0		395863			0.373663
79289	2		396363	53		792863	9		396363			0.373863
79389	0		396863	94		793863	11		396863			0.371463
79489	0		397363	1		794863	7		397363			0.370163
79589	0		397863	2		795863	5		397863			0.374763
79689	9		398363	1		796863	7		398363			0.376062
79789	10		398863	3		797863	0		398863			0.377862
79889	6		399363	4		798863	7		399363			0.374663
79989	3		399863	65		799863	6		399863			0.372263
80089	2		400363	2		800863	3		400363			0.371363
80189	1		400863	50		801863	4		400863			0.370263
80289	1		401363	2		802863	4		401363			0.371663
80389	1		401863	0		803863	1		401863	1		0.370263
80489	2		402363	6		804863	0		402363			0.371963
80589	257		402863	5		805863	2		402863			0.373263
80689	260		403363	2		806863	4		403363			0.376062
80789	196		403863	2		807863	7		403863			0.375262
80889	2		404363	2		808863	1		404363			0.371163
80989	0		404863	1		809863	0		404863			0.370063
81089	5		405363	0		810863	6		405363	1		0.368663
81189	2138		405863	2		811863	2		405863			0.368863
81289	2137		406363	0		812863	3		406363	1		0.365263
81389	213		406863	7		813863	33		406863			0.363764
81489	211		407363	0		814863	35		407363	1		0.364964
81589	2		407863	3		815863	19		407863			0.361464
81689	1		408363	27		816863	12		408363			0.361264
81789	0		408863	27		817863	2		408863			0.358364
81889	4		409363	2		818863	1		409363			0.356564
81989	5		409863	11		819863	0		409863			0.358864
82089	4		410363	20		820863	1		410363			0.359664
82189	3		410863	1		821863	1		410863			0.358964
82289	1190		411363	15		822863	0		411363			0.359764
82389	1189		411863	11		823863	0		411863			0.361964
82489	0		412363	4		824863	1		412363			0.362864
82589	0		412863	13		825863	0		412863			0.363564
82689	0		413363	4		826863	1		413363			0.361564
82789	0		413863	1		827863	0		413863			0.359264
82889	0		414363	4		828863	0		414363			0.364364
82989	0		414863	4		829863	36		414863			0.366863
83089	0		415363	2		830863	162		415363			0.367463
83189	0		415863	6		831863	102		415863			0.364464
83289	1		416363	8		832863	1		416363			0.363764
83389	1		416863	9		833863	3		416863			0.362764
83489	0		417363	6		834863	8		417363			0.361164
83589	0		417863	6		835863	23		417863			0.361964
83689	0		418363	0		836863	0		418363	1		0.362664
83789	0		418863	19		837863	0		418863			0.366663
83889	0		419363	4		838863	0		419363			0.371363
83989	0		419863	4		839863	1		419863			0.370863
84089	3		420363	0		840863	2		420363	1		0.370463
84189	3		420863	0		841863	5		420863	1		0.372263
84289	2		421363	0		842863	3		421363	1		0.374763
84389	1		421863	6		843863	7		421863			0.377662
84489	0		422363	9		844863	3		422363			0.379162
84589	0		422863	22		845863	4		422863			0.380162
84689	0		423363	22		846863	38		423363			0.376762
84789	0		423863	1		847863	4		423863			0.376462
84889	0		424363	5		848863	12		424363			0.369363
84989	0		424863	186		849863	32		424863			0.367563
85089	8		425363	186		850863	41		425363			0.365863
85189	8		425863	12		851863	330		425863			0.366363
85289	6		426363	192		852863	363		426363			0.371963
85389	0		426863	1		853863	363		426863			0.375762
85489	0		427363	2		854863	73		427363			0.376862
85589	0		427863	1		855863	82		427863			0.377962
85689	0		428363	1		856863	27		428363			0.374863
85789	1		428863	1		857863	21		428863			0.373163
85889	1		429363	0		858863	140		429363	1		0.372763
85989	2		429863	15		859863	44		429863			0.374163
86089	2		430363	9		860863	14		430363			0.374963
86189	0		430863	14		861863	8		430863			0.379662
86289	0		431363	18		862863	16		431363			0.377262
86389	0		431863	8		863863	11		431863			0.375362
86489	0		432363	2		864863	1		432363			0.372063
86589	0		432863	2		865863	7		432863			0.370563
86689	0		433363	9		866863	12		433363			0.371763
86789	13		433863	1		867863	1		433863			0.375962
86889	14		434363	2		868863	4		434363			0.381762
86989	1		434863	1		869863	10		434863			0.385361
87089	0		435363	3		870863	3		435363			0.387761
87189	0		435863	2		871863	5		435863			0.393961
87289	0		436363	4		872863	4		436363			0.392061
87389	0		436863	2		873863	4		436863			0.390861
87489	0		437363	1		874863	8		437363			0.389461
87589	0		437863	2		875863	10		437863			0.386161
87689	0		438363	6		876863	5		438363			0.385361
87789	0		438863	7		877863	1		438863			0.385961
87889	0		439363	0		878863	4		439363	1		0.386161
87989	0		439863	1		879863	2		439863			0.384462
88089	0		440363	0		880863	3		440363	1		0.387661
88189	0		440863	1		881863	1		440863			0.379662
88289	0		441363	3		882863	5		441363			0.376362
88389	0		441863	3		883863	5		441863			0.375162
88489	0		442363	4		884863	79		442363			0.378662
88589	0		442863	1		885863	67		442863			0.375062
88689	0		443363	0		886863	2		443363	1		0.374863
88789	0		443863	2		887863	4		443863			0.369663
88889	0		444363	1		888863	1		444363			0.366163
88989	0		444863	0		889863	9		444863	1		0.363464
89089	0		445363	0		890863	0		445363	1		0.363064
89189	3		445863	0		891863	0		445863	1		0.357464
89289	3		446363	0		892863	0		446363	1		0.357264
89389	2		446863	0		893863	0		446863	1		0.353865
89489	0		447363	0		894863	1		447363	1		0.352865
89589	0		447863	0		895863	2		447863	1		0.353065
89689	0		448363	0		896863	3		448363	1		0.353165
89789	0		448863	4		897863	2		448863			0.352965
89889	0		449363	189		898863	1		449363			0.360164
89989	1		449863	4		899863	1		449863			0.367963
90089	2		450363	76		900863	1		450363			0.371463
90189	2		450863	10		901863	1		450863			0.374063
90289	444		451363	0		902863	0		451363	1		0.380562
90389	440		451863	0		903863	2		451863	1		0.387261
90489	0		452363	2		904863	1		452363			0.390561
90589	0		452863	1		905863	0		452863			0.39886
90689	1		453363	0		906863	1		453363	1		0.406459
90789	21		453863	7		907863	1		453863			0.416758
90889	431		454363	0		908863	1		454363	1		0.419158
90989	422		454863	56		909863	28		454863			0.420558
91089	5		455363	1		910863	28		455363			0.417558
91189	3		455863	5		911863	4		455863			0.417058
91289	3		456363	2		912863	1		456363			0.413459
91389	0		456863	0		913863	3		456863	1		0.411959
91489	0		457363	0		914863	1		457363	1		0.408159
91589	0		457863	0		915863	6		457863	1		0.410859
91689	0		458363	0		916863	20		458363	1		0.415758
91789	0		458863	2		917863	4		458863			0.418258
91889	0		459363	2		918863	7		459363			0.410259
91989	0		459863	33		919863	6		459863			0.39856
92089	1		460363	1		920863	15		460363			0.391261
92189	8		460863	50		921863	2		460863			0.394661
92289	8		461363	19		922863	5		461363			0.388961
92389	1		461863	0		923863	4		461863	1		0.385761
92489	1		462363	1		924863	3		462363			0.382462
92589	0		462863	1		925863	0		462863			0.374863
92689	0		463363	1		926863	10		463363			0.366463
92789	0		463863	2		927863	35		463863			0.358364
92889	0		464363	0		928863	35		464363	1		0.358264
92989	0		464863	1		929863	3		464863			0.355764
93089	0		465363	1		930863	2		465363			0.354365
93189	0		465863	4		931863	2		465863			0.351665
93289	0		466363	1		932863	2		466363			0.353565
93389	0		466863	1		933863	1		466863			0.357064
93489	0		467363	6		934863	1		467363			0.358964
93589	0		467863	0		935863	9		467863	1		0.357664
93689	0		468363	8		936863	3		468363			0.352565
93789	0		468863	18		937863	1		468863			0.346765
93889	0		469363	3		938863	1		469363			0.343966
93989	0		469863	1		939863	3		469863			0.345265
94089	0		470363	0		940863	3		470363	1		0.342166
94189	0		470863	1		941863	1		470863			0.338166
94289	0		471363	1		942863	0		471363			0.340866
94389	0		471863	5		943863	1		471863			0.340966
94489	2		472363	0		944863	1		472363	1		0.340666
94589	2		472863	0		945863	903		472863	1		0.342466
94689	0		473363	6		946863	9390		473363			0.345065
94789	0		473863	0		947863	9845		473863	1		0.346865
94889	0		474363	1		948863	5		474363			0.348865
94989	0		474863	3		949863	4		474863			0.349065
95089	0		475363	1		950863	5		475363			0.354365
95189	2		475863	1		951863	2		475863			0.357864
95289	2		476363	8		952863	1		476363			0.358764
95389	3		476863	40		953863	3		476863			0.357664
95489	3		477363	17		954863	4		477363			0.357464
95589	0		477863	141		955863	5		477863			0.355264
95689	0		478363	14		956863	12		478363			0.357364
95789	0		478863	64		957863	0		478863			0.363064
95889	1		479363	1		958863	0		479363			0.363164
95989	1		479863	1		959863	15		479863			0.365063
96089	0		480363	7		960863	5		480363			0.367263
96189	0		480863	3		961863	18		480863			0.369363
96289	0		481363	9		962863	35		481363			0.368263
96389	0		481863	9		963863	5		481863			0.362264
96489	1		482363	3		964863	2		482363			0.359364
96589	1		482863	4		965863	0		482863			0.357564
96689	0		483363	24		966863	2		483363			0.352165
96789	0		483863	10		967863	2		483863			0.347665
96889	0		484363	9		968863	71		484363			0.346665
96989	2		484863	6		969863	23		484863			0.350365
97089	2		485363	4		970863	45		485363			0.350865
97189	0		485863	3		971863	10		485863			0.353965
97289	0		486363	10		972863	7		486363			0.356064
97389	0		486863	18		973863	53		486863			0.354665
97489	1		487363	36		974863	60		487363			0.357564
97589	0		487863	5		975863	10		487863			0.362864
97689	0		488363	0		976863	183		488363	1		0.367463
97789	1		488863	2		977863	156		488863			0.362964
97889	1		489363	57		978863	2		489363			0.366963
97989	1		489863	3		979863	1		489863			0.367363
98089	0		490363	1		980863	13		490363			0.367863
98189	0		490863	1		981863	41		490863			0.366863
98289	0		491363	1		982863	92		491363			0.366463
98389	0		491863	1		983863	88		491863			0.367263
98489	0		492363	2		984863	6		492363			0.367663
98589	0		492863	1		985863	8		492863			0.366563
98689	0		493363	8		986863	5		493363			0.368963
98789	0		493863	14		987863	10		493863			0.370163
98889	0		494363	3		988863	3		494363			0.368463
98989	0		494863	3		989863	1		494863			0.367463
99089	0		495363	6		990863	13		495363			0.368063
99189	0		495863	24		991863	29		495863			0.367363
99289	0		496363	23		992863	6		496363			0.367763
99389	0		496863	130		993863	3		496863			0.372463
99489	0		497363	0		994863	6		497363	1		0.376362
99589	0		497863	1		995863	29		497863			0.375762
99689	0		498363	8		996863	26		498363			0.377462
99789	0		498863	8		997863	23		498863			0.375562
99889	1		499363	15		998863	1		499363			0.374863
99989	1		499863	17		999863	15		499863			0.374863
100089	0		500363	4		1000863	25		500363			0.372863
100189	4		500863	60		1001863	13		500863			0.372463
100289	4		501363	86		1002863	1		501363			0.372263
100389	3		501863	86		1003863	7		501863			0.375762
100489	0		502363	7		1004863	63		502363			0.376962
100589	1		502863	33		1005863	32		502863			0.380862
100689	2		503363	1		1006863	8		503363			0.383462
100789	1		503863	0		1007863	3		503863	1		0.386561
100889	0		504363	7		1008863	3		504363			0.384162
100989	0		504863	5		1009863	5		504863			0.383662
101089	0		505363	0		1010863	4		505363	1		0.380662
101189	0		505863	2		1011863	9		505863			0.376662
101289	0		506363	2		1012863	8		506363			0.373263
101389	0		506863	2		1013863	8		506863			0.372263
101489	0		507363	0		1014863	54		507363	1		0.367463
101589	0		507863	2		1015863	58		507863			0.366963
101689	0		508363	18		1016863	39		508363			0.363264
101789	3		508863	0		1017863	11		508863	1		0.366763
101889	3		509363	26		1018863	24		509363			0.368363
101989	2		509863	3		1019863	28		509863			0.369563
102089	0		510363	43		1020863	16		510363			0.371763
102189	1		510863	1		1021863	20		510863			0.373763
102289	1		511363	0		1022863	14		511363	1		0.372363
102389	3		511863	7		1023863	7		511863			0.372563
102489	5		512363	1		1024863	7		512363			0.372663
102589	4		512863	22		1025863	177		512863			0.371163
102689	1		513363	15		1026863	24		513363			0.369963
102789	1		513863	17		1027863	265		513863			0.370863
102889	1		514363	0		1028863	3		514363	1		0.374763
102989	1		514863	1		1029863	9		514863			0.375662
103089	16		515363	12		1030863	10		515363			0.375862
103189	19		515863	2		1031863	3		515863			0.375762
103289	17		516363	15		1032863	6		516363			0.377062
103389	0		516863	15		1033863	35		516863			0.378762
103489	0		517363	3		1034863	36		517363			0.382362
103589	0		517863	3		1035863	6		517863			0.381962
103689	2		518363	10		1036863	9		518363			0.378662
103789	3		518863	2		1037863	6		518863			0.378762
103889	3		519363	2		1038863	39		519363			0.383462
103989	1		519863	1		1039863	53		519863			0.383462
104089	0		520363	1		1040863	57		520363			0.386261
104189	0		520863	2		1041863	1		520863			0.387061
104289	1		521363	1		1042863	3		521363			0.390261
104389	1		521863	1		1043863	1		521863			0.386961
104489	11		522363	6		1044863	5		522363			0.385461
104589	11		522863	0		1045863	1		522863	1		0.385861
104689	0		523363	6		1046863	2		523363			0.387861
104789	0		523863	1		1047863	2		523863			0.383862
104889	0		524363	10		1048863	1		524363			0.378662
104989	0		524863	11		1049863	0		524863			0.376262
105089	0		525363	16		1050863	0		525363			0.375162
105189	0		525863	1		1051863	0		525863			0.378762
105289	3		526363	2		1052863	0		526363			0.379362
105389	3		526863	13		1053863	0		526863			0.378762
105489	0		527363	0		1054863	88		527363	1		0.377462
105589	0		527863	1		1055863	66		527863			0.377362
105689	0		528363	0		1056863	5		528363	1		0.382762
105789	0		528863	0		1057863	15		528863	1		0.384162
105889	1		529363	1		1058863	16		529363			0.379962
105989	1		529863	2		1059863	0		529863			0.381362
106089	1		530363	11		1060863	3		530363			0.380762
106189	0		530863	68		1061863	7		530863			0.380262
106289	5		531363	67		1062863	1		531363			0.380162
106389	5		531863	94		1063863	2		531863			0.382262
106489	0		532363	0		1064863	3		532363	1		0.383362
106589	0		532863	6		1065863	15		532863			0.383562
106689	0		533363	1		1066863	19		533363			0.383362
106789	0		533863	2		1067863	1		533863			0.384662
106889	1		534363	2		1068863	3		534363			0.387761
106989	1		534863	4		1069863	4		534863			0.384562
107089	0		535363	3		1070863	5		535363			0.386161
107189	0		535863	3		1071863	2		535863			0.383362
107289	1		536363	2		1072863	0		536363			0.383162
107389	1		536863	4		1073863	2		536863			0.381362
107489	0		537363	7		1074863	1		537363			0.378462
107589	0		537863	13		1075863	1		537863			0.378062
107689	0		538363	7		1076863	1		538363			0.375162
107789	0		538863	8		1077863	15		538863			0.373163
107889	0		539363	6		1078863	7		539363			0.372863
107989	0		539863	1		1079863	13		539863			0.371263
108089	0		540363	70		1080863	2		540363			0.370363
108189	0		540863	3		1081863	9		540863			0.368063
108289	1		541363	67		1082863	20		541363			0.363364
108389	1		541863	3		1083863	21		541863			0.358164
108489	0		542363	3		1084863	6		542363			0.357164
108589	0		542863	0		1085863	32		542863	1		0.359464
108689	0		543363	2		1086863	10		543363			0.359764
108789	0		543863	5		1087863	4		543863			0.361964
108889	0		544363	5		1088863	7		544363			0.361964
108989	0		544863	6		1089863	0		544863			0.367263
109089	1		545363	6		1090863	0		545363			0.368763
109189	2		545863	6		1091863	0		545863			0.373263
109289	1		546363	0		1092863	1		546363	1		0.374063
109389	6		546863	0		1093863	1		546863	1		0.373963
109489	6		547363	2		1094863	5		547363			0.376262
109589	2		547863	4		1095863	2		547863			0.379062
109689	2		548363	5		1096863	1		548363			0.378362
109789	0		548863	28		1097863	2		548863			0.382262
109889	21		549363	4		1098863	2		549363			0.381762
109989	25		549863	38		1099863	5		549863			0.382862
110089	25		550363	0		1100863	42		550363	1		0.382262
110189	17		550863	2		1101863	8		550863			0.379362
110289	17		551363	1		1102863	17		551363			0.385861
110389	3		551863	0		1103863	11		551863	1		0.393761
110489	4		552363	2		1104863	13		552363			0.392661
110589	2		552863	13		1105863	4		552863			0.390461
110689	2		553363	7		1106863	3		553363			0.388161
110789	3		553863	22		1107863	0		553863			0.383162
110889	29		554363	0		1108863	0		554363	1		0.385761
110989	25		554863	2		1109863	86		554863			0.383062
111089	1		555363	0		1110863	72		555363	1		0.381262
111189	2		555863	4		1111863	22		555863			0.377262
111289	2		556363	3		1112863	4		556363			0.375562
111389	0		556863	3		1113863	1		556863			0.374863
111489	0		557363	8		1114863	5		557363			0.375662
111589	2		557863	1		1115863	212		557863			0.374263
111689	2		558363	4		1116863	526		558363			0.376362
111789	2		558863	10		1117863	282		558863			0.375362
111889	5		559363	14		1118863	110		559363			0.374963
111989	16		559863	0		1119863	32		559863	1		0.374763
112089	14		560363	6		1120863	19		560363			0.372663
112189	1		560863	2		1121863	0		560863			0.375462
112289	5		561363	0		1122863	3		561363	1		0.372663
112389	5		561863	6		1123863	2		561863			0.367463
112489	10		562363	2		1124863	32		562363			0.369463
112589	10		562863	7		1125863	32		562863			0.368563
112689	9		563363	4		1126863	39		563363			0.369663
112789	10		563863	1		1127863	6		563863			0.368063
112889	3		564363	2		1128863	3		564363			0.361464
112989	0		564863	4		1129863	8		564863			0.361064
113089	0		565363	1		1130863	6		565363			0.358864
113189	1		565863	2		1131863	19		565863			0.363564
113289	2		566363	0		1132863	6		566363	1		0.366163
113389	4		566863	1		1133863	69		566863			0.369463
113489	3		567363	1		1134863	69		567363			0.368263
113589	1		567863	1		1135863	2		567863			0.361464
113689	5		568363	0		1136863	1		568363	1		0.360264
113789	5		568863	115		1137863	0		568863			0.360964
113889	3		569363	115		1138863	3		569363			0.357564
113989	0		569863	25		1139863	0		569863			0.356064
114089	0		570363	173		1140863	0		570363			0.356564
114189	2		570863	92		1141863	30		570863			0.356564
114289	2		571363	18		1142863	27		571363			0.354165
114389	0		571863	19		1143863	1		571863			0.356964
114489	0		572363	1		1144863	2		572363			0.356264
114589	0		572863	8		1145863	1		572863			0.361864
114689	0		573363	8		1146863	22		573363			0.362764
114789	1		573863	1		1147863	22		573863			0.371363
114889	1		574363	3		1148863	23		574363			0.376162
114989	0		574863	4		1149863	1		574863			0.377862
115089	1		575363	6		1150863	1		575363			0.380662
115189	0		575863	0		1151863	1		575863	1		0.376162
115289	0		576363	0		1152863	1		576363	1		0.372963
115389	0		576863	1		1153863	1		576863			0.370163
115489	0		577363	2		1154863	0		577363			0.364964
115589	0		577863	2		1155863	0		577863			0.369063
115689	0		578363	0		1156863	1		578363	1		0.365563
115789	0		578863	5		1157863	0		578863			0.362964
115889	0		579363	5		1158863	1		579363			0.367563
115989	0		579863	5		1159863	3		579863			0.364564
116089	0		580363	8		1160863	4		580363			0.363164
116189	0		580863	8		1161863	2		580863			0.359964
116289	0		581363	0		1162863	7		581363	1		0.358864
116389	1		581863	0		1163863	4		581863	1		0.355764
116489	1		582363	1		1164863	30		582363			0.352565
116589	0		582863	0		1165863	9		582863	1		0.345565
116689	0		583363	1		1166863	135		583363			0.343566
116789	0		583863	66		1167863	416		583863			0.337966
116889	0		584363	51		1168863	2		584363			0.337366
116989	4		584863	51		1169863	54		584863			0.335766
117089	4		585363	0		1170863	37		585363	1		0.336266
117189	1		585863	0		1171863	10		585863	1		0.332667
117289	2		586363	0		1172863	19		586363	1		0.328467
117389	2		586863	1		1173863	29		586863			0.327667
117489	0		587363	0		1174863	12		587363	1		0.330867
117589	0		587863	0		1175863	9		587863	1		0.332267
117689	0		588363	0		1176863	2		588363	1		0.334567
117789	0		588863	1		1177863	2		588863			0.333867
117889	0		589363	0		1178863	0		589363	1		0.330367
117989	0		589863	0		1179863	6		589863	1		0.332867
118089	0		590363	0		1180863	71		590363	1		0.333867
118189	0		590863	0		1181863	3		590863	1		0.338566
118289	0		591363	12		1182863	4		591363			0.340766
118389	0		591863	39		1183863	18		591863			0.339066
118489	0		592363	36		1184863	9		592363			0.341666
118589	0		592863	71		1185863	1		592863			0.340766
118689	0		593363	68		1186863	8		593363			0.340166
118789	0		593863	6		1187863	15		593863			0.340566
118889	0		594363	6		1188863	6		594363			0.339866
118989	0		594863	0		1189863	7		594863	1		0.341666
119089	0		595363	3		1190863	1		595363			0.336366
119189	1		595863	2		1191863	9		595863			0.339366
119289	1		596363	0		1192863	9		596363	1		0.345565
119389	1		596863	1		1193863	3		596863			0.348865
119489	1		597363	1		1194863	3		597363			0.352265
119589	1		597863	0		1195863	3		597863	1		0.350165
119689	0		598363	5		1196863	6		598363			0.349165
119789	0		598863	0		1197863	5		598863	1		0.349465
119889	0		599363	5		1198863	4		599363			0.350965
119989	0		599863	1		1199863	122		599863			0.349665
120089	0		600363	0		1200863	32		600363	1		0.353965
120189	0		600863	0		1201863	29		600863	1		0.360564
120289	0		601363	1		1202863	2		601363			0.368463
120389	4		601863	3		1203863	15		601863			0.378662
120489	3		602363	0		1204863	47		602363	1		0.378462
120589	0		602863	0		1205863	47		602863	1		0.386961
120689	0		603363	0		1206863	52		603363	1		0.39566
120789	0		603863	1		1207863	8		603863			0.40146
120889	1		604363	2		1208863	4		604363			0.408759
120989	1		604863	9		1209863	0		604863			0.414959
121089	0		605363	32		1210863	1		605363			0.425557
121189	2		605863	0		1211863	1		605863	1		0.427557
121289	2		606363	1		1212863	2		606363			0.424358
121389	1		606863	0		1213863	0		606863	1		0.422758
121489	0		607363	10		1214863	1		607363			0.420658
121589	0		607863	0		1215863	4		607863	1		0.423758
121689	0		608363	1		1216863	8		608363			0.424458
121789	0		608863	0		1217863	9		608863	1		0.426157
121889	25		609363	0		1218863	1		609363	1		0.426357
121989	25		609863	0		1219863	2		609863	1		0.428657
122089	24		610363	4		1220863	0		610363			0.426057
122189	0		610863	9		1221863	6		610863			0.419158
122289	0		611363	27		1222863	7		611363			0.413659
122389	0		611863	10		1223863	24		611863			0.40466
122489	0		612363	16		1224863	18		612363			0.407259
122589	0		612863	2		1225863	44		612863			0.40106
122689	0		613363	0		1226863	40		613363	1		0.39686
122789	2		613863	0		1227863	66		613863	1		0.394061
122889	2		614363	4		1228863	70		614363			0.384062
122989	2		614863	5		1229863	18		614863			0.375862
123089	1		615363	2		1230863	50		615363			0.368763
123189	1		615863	3		1231863	9		615863			0.368263
123289	1		616363	0		1232863	2		616363	1		0.371763
123389	1		616863	53		1233863	2		616863			0.372863
123489	0		617363	2		1234863	6		617363			0.370163
123589	13		617863	28		1235863	30		617863			0.370363
123689	13		618363	10		1236863	466		618363			0.371863
123789	0		618863	2		1237863	29		618863			0.369363
123889	0		619363	3		1238863	32		619363			0.367363
123989	1		619863	0		1239863	2		619863	1		0.364164
124089	1		620363	2		1240863	7		620363			0.359264
124189	0		620863	3		1241863	16		620863			0.353865
124289	0		621363	4		1242863	52		621363			0.351365
124389	0		621863	0		1243863	1		621863	1		0.354865
124489	0		622363	2		1244863	1		622363			0.350265
124589	0		622863	1		1245863	21		622863			0.350365
124689	0		623363	0		1246863	8		623363	1		0.348765
124789	0		623863	0		1247863	19		623863	1		0.346565
124889	0		624363	0		1248863	13		624363	1		0.353265
124989	0		624863	0		1249863	3		624863	1		0.352865
125089	0		625363	0		1250863	74		625363	1		0.352665
125189	0		625863	0		1251863	93		625863	1		0.353165
125289	0		626363	0		1252863	5		626363	1		0.355264
125389	0		626863	1		1253863	3		626863			0.350565
125489	0		627363	1		1254863	26		627363			0.350565
125589	0		627863	0		1255863	24		627863	1		0.346665
125689	0		628363	0		1256863	27		628363	1		0.345765
125789	0		628863	2		1257863	2		628863			0.345365
125889	0		629363	0		1258863	9		629363	1		0.343166
125989	0		629863	3		1259863	5		629863			0.342166
126089	2		630363	6		1260863	2		630363			0.348565
126189	2		630863	3		1261863	2		630863			0.353665
126289	2		631363	0		1262863	2		631363	1		0.355364
126389	3		631863	1		1263863	0		631863			0.353665
126489	3		632363	2		1264863	3		632363			0.355664
126589	3		632863	0		1265863	5		632863	1		0.353265
126689	2		633363	1		1266863	0		633363			0.350765
126789	0		633863	0		1267863	6		633863	1		0.347465
126889	0		634363	0		1268863	6		634363	1		0.347065
126989	10		634863	7		1269863	7		634863			0.348665
127089	10		635363	19		1270863	12		635363			0.351465
127189	1		635863	7		1271863	48		635863			0.351765
127289	0		636363	70		1272863	15		636363			0.350265
127389	5		636863	0		1273863	26		636863	1		0.352765
127489	6		637363	0		1274863	28		637363	1		0.358164
127589	6		637863	0		1275863	1		637863	1		0.360264
127689	1		638363	0		1276863	2		638363	1		0.362564
127789	1		638863	3		1277863	3		638863			0.362964
127889	1		639363	5		1278863	2		639363			0.367463
127989	0		639863	4		1279863	1		639863			0.370863
128089	0		640363	4		1280863	2		640363			0.370163
128189	0		640863	3		1281863	4		640863			0.368063
128289	0		641363	0		1282863	29		641363	1		0.366863
128389	0		641863	0		1283863	26		641863	1		0.368163
128489	0		642363	0		1284863	8		642363	1		0.369363
128589	0		642863	3		1285863	1		642863			0.373863
128689	0		643363	7		1286863	4		643363			0.376062
128789	0		643863	5		1287863	2		643863			0.376962
128889	0		644363	14		1288863	1		644363			0.371863
128989	0		644863	1		1289863	61		644863			0.370563
129089	0		645363	11		1290863	104		645363			0.369263
129189	0		645863	0		1291863	47		645863	1		0.364364
129289	1		646363	19		1292863	45		646363			0.362564
129389	1		646863	33		1293863	1		646863			0.363964
129489	0		647363	4		1294863	1		647363			0.364564
129589	0		647863	0		1295863	8		647863	1		0.363664
129689	0		648363	0		1296863	11		648363	1		0.363664
129789	0		648863	0		1297863	3		648863	1		0.363264
129889	0		649363	0		1298863	4		649363	1		0.358364
129989	0		649863	1		1299863	4		649863			0.358264
130089	0		650363	0		1300863	3		650363	1		0.364864
130189	0		650863	3		1301863	6		650863			0.373263
130289	0		651363	1		1302863	5		651363			0.381562
130389	0		651863	3		1303863	87		651863			0.380862
130489	0		652363	2		1304863	39		652363			0.383762
130589	0		652863	118		1305863	59		652863			0.387961
130689	0		653363	79		1306863	2		653363			0.392661
130789	0		653863	80		1307863	4		653863			0.40006
130889	0		654363	1		1308863	7		654363			0.408659
130989	0		654863	9		1309863	3		654863			0.418158
131089	0		655363	0		1310863	3		655363	1		0.420558
131189	0		655863	0		1311863	0		655863	1		0.419758
131289	0		656363	2		1312863	3		656363			0.415258
131389	0		656863	15		1313863	1		656863			0.413259
131489	0		657363	13		1314863	3		657363			0.410659
131589	0		657863	0		1315863	5		657863	1		0.411059
131689	0		658363	0		1316863	21		658363	1		0.405559
131789	1		658863	0		1317863	15		658863	1		0.407759
131889	1		659363	0		1318863	10		659363	1		0.413959
131989	0		659863	0		1319863	18		659863	1		0.411459
132089	0		660363	3		1320863	0		660363			0.40376
132189	0		660863	0		1321863	2		660863	1		0.394861
132289	1		661363	0		1322863	2675		661363	1		0.387961
132389	1		661863	0		1323863	1466		661863	1		0.389261
132489	3		662363	0		1324863	9		662363	1		0.384962
132589	3		662863	1		1325863	107		662863			0.377562
132689	0		663363	0		1326863	97		663363	1		0.371663
132789	0		663863	1		1327863	5		663863			0.368963
132889	0		664363	0		1328863	4		664363	1		0.361964
132989	1		664863	0		1329863	0		664863	1		0.352765
133089	1		665363	0		1330863	1		665363	1		0.350965
133189	0		665863	0		1331863	2		665863	1		0.354165
133289	1		666363	0		1332863	3		666363	1		0.359864
133389	3		666863	35		1333863	24		666863			0.361164
133489	2		667363	11		1334863	43		667363			0.360564
133589	1		667863	9		1335863	7		667863			0.360164
133689	0		668363	18		1336863	17		668363			0.365063
133789	0		668863	7		1337863	10		668863			0.363064
133889	0		669363	2		1338863	11		669363			0.357264
133989	0		669863	2		1339863	1		669863			0.359564
134089	0		670363	1		1340863	1		670363			0.361264
134189	0		670863	2		1341863	4		670863			0.363264
134289	0		671363	0		1342863	12		671363	1		0.362764
134389	0		671863	0		1343863	2		671863	1		0.360764
134489	0		672363	0		1344863	2		672363	1		0.360764
134589	1		672863	4		1345863	9		672863			0.363064
134689	2		673363	4		1346863	2		673363			0.362664
134789	2		673863	0		1347863	1		673863	1		0.361264
134889	2		674363	0		1348863	2		674363	1		0.364464
134989	2		674863	4		1349863	2		674863			0.368563
135089	0		675363	1		1350863	1		675363			0.365663
135189	0		675863	8		1351863	34		675863			0.364064
135289	0		676363	1		1352863	26		676363			0.362964
135389	0		676863	6		1353863	6		676863			0.365863
135489	0		677363	5		1354863	6		677363			0.370363
135589	0		677863	3		1355863	15		677863			0.373463
135689	0		678363	6		1356863	8		678363			0.372263
135789	0		678863	8		1357863	11		678863			0.369863
135889	0		679363	2		1358863	0		679363			0.374263
135989	0		679863	1		1359863	0		679863			0.373263
136089	0		680363	1		1360863	2		680363			0.372963
136189	0		680863	0		1361863	8		680863	1		0.370863
136289	0		681363	4		1362863	58		681363			0.372563
136389	0		681863	4		1363863	166		681863			0.378162
136489	2		682363	4		1364863	166		682363			0.379862
136589	3		682863	2		1365863	72		682863			0.378662
136689	1		683363	2		1366863	6		683363			0.377862
136789	1		683863	106		1367863	2		683863			0.375962
136889	1		684363	89		1368863	0		684363			0.371763
136989	0		684863	23		1369863	1		684863			0.367663
137089	0		685363	48		1370863	8		685363			0.368363
137189	0		685863	1		1371863	1		685863			0.370463
137289	2		686363	6		1372863	2		686363			0.367863
137389	2		686863	6		1373863	0		686863			0.361664
137489	0		687363	3		1374863	5		687363			0.357664
137589	0		687863	0		1375863	2		687863	1		0.358464
137689	1		688363	0		1376863	2		688363	1		0.362464
137789	1		688863	2		1377863	0		688863			0.368063
137889	0		689363	0		1378863	4		689363	1		0.363964
137989	0		689863	1		1379863	1		689863			0.363564
138089	0		690363	0		1380863	3		690363	1		0.361064
138189	0		690863	0		1381863	2		690863	1		0.362864
138289	0		691363	0		1382863	10		691363	1		0.360964
138389	0		691863	1		1383863	11		691863			0.358764
138489	1		692363	2		1384863	4		692363			0.360064
138589	2		692863	2		1385863	16		692863			0.362464
138689	1		693363	0		1386863	122		693363	1		0.362964
138789	1		693863	0		1387863	1		693863	1		0.366563
138889	1		694363	0		1388863	0		694363	1		0.365063
138989	1		694863	7		1389863	7		694863			0.366363
139089	1		695363	7		1390863	6		695363			0.369863
139189	0		695863	61		1391863	4		695863			0.374263
139289	0		696363	56		1392863	5		696363			0.375662
139389	0		696863	44		1393863	3		696863			0.381862
139489	0		697363	2		1394863	2		697363			0.382162
139589	0		697863	0		1395863	3		697863	1		0.379362
139689	3		698363	0		1396863	2		698363	1		0.374263
139789	3		698863	11		1397863	3		698863			0.372263
139889	0		699363	1		1398863	15		699363			0.375062
139989	0		699863	2		1399863	2		699863			0.376462
140089	0		700363	7		1400863	34		700363			0.377762
140189	6		700863	1		1401863	38		700863			0.379562
140289	123		701363	0		1402863	38		701363	1		0.378762
140389	121		701863	0		1403863	13		701863	1		0.376662
140489	4		702363	0		1404863	92		702363	1		0.377062
140589	3		702863	0		1405863	26		702863	1		0.378462
140689	0		703363	3		1406863	14		703363			0.381462
140789	2		703863	0		1407863	1		703863	1		0.379262
140889	3		704363	2		1408863	15		704363			0.381262
140989	1		704863	112		1409863	11		704863			0.382762
141089	11		705363	112		1410863	1		705363			0.381562
141189	485		705863	408		1411863	11		705863			0.381462
141289	478		706363	188		1412863	11		706363			0.383462
141389	12		706863	581		1413863	12		706863			0.384562
141489	233		707363	5		1414863	1		707363			0.387161
141589	230		707863	3		1415863	1		707863			0.386961
141689	8		708363	34		1416863	4		708363			0.389761
141789	10		708863	1		1417863	3		708863			0.391961
141889	8		709363	49		1418863	0		709363			0.39506
141989	16		709863	10		1419863	3		709863			0.39746
142089	15		710363	1		1420863	2		710363			0.40076
142189	170		710863	4		1421863	2		710863			0.40036
142289	185		711363	2		1422863	2		711363			0.40106
142389	177		711863	6		1423863	11		711863			0.40126
142489	0		712363	8		1424863	10		712363			0.39746
142589	0		712863	8		1425863	11		712863			0.394661
142689	0		713363	6		1426863	46		713363			0.394161
142789	0		713863	25		1427863	37		713863			0.394161
142889	1		714363	4		1428863	28		714363			0.39506
142989	2		714863	22		1429863	1		714863			0.393261
143089	2		715363	1		1430863	1		715363			0.394861
143189	2		715863	2		1431863	2		715863			0.392361
143289	2		716363	4		1432863	2		716363			0.390561
143389	1		716863	0		1433863	0		716863	1		0.389161
143489	1		717363	0		1434863	0		717363	1		0.386361
143589	1		717863	1		1435863	12		717863			0.387561
143689	1		718363	0		1436863	20		718363	1		0.384262
143789	0		718863	0		1437863	19		718863	1		0.377362
143889	0		719363	11		1438863	16		719363			0.372863
143989	0		719863	1		1439863	4		719863			0.372163
144089	0		720363	3		1440863	3		720363			0.368563
144189	0		720863	3		1441863	1		720863			0.364764
144289	0		721363	1		1442863	9		721363			0.364664
144389	0		721863	7		1443863	3		721863			0.367963
144489	0		722363	1		1444863	1		722363			0.371863
144589	2		722863	1		1445863	4		722863			0.371363
144689	2		723363	0		1446863	9		723363	1		0.369863
144789	0		723863	0		1447863	3		723863	1		0.370463
144889	0		724363	1		1448863	1		724363			0.370363
144989	0		724863	6		1449863	0		724863			0.370363
145089	0		725363	3		1450863	0		725363			0.367263
145189	0		725863	2		1451863	8		725863			0.367063
145289	1		726363	5		1452863	17		726363			0.368263
145389	1		726863	7		1453863	0		726863			0.368163
145489	0		727363	3		1454863	1		727363			0.363964
145589	2		727863	8		1455863	1		727863			0.360764
145689	4		728363	2		1456863	418		728363			0.359964
145789	2		728863	7		1457863	80		728863			0.368363
145889	0		729363	0		1458863	243		729363	1		0.370463
145989	0		729863	26		1459863	3		729863			0.366863
146089	1		730363	7223		1460863	0		730363			0.366063
146189	1		730863	331		1461863	0		730863			0.368363
146289	0		731363	6137		1462863	6		731363			0.367063
146389	0		731863	0		1463863	9		731863	1		0.363864
146489	0		732363	0		1464863	2		732363	1		0.359964
146589	0		732863	2		1465863	3		732863			0.360264
146689	0		733363	22		1466863	28		733363			0.359364
146789	2		733863	387		1467863	21		733863			0.356064
146889	2		734363	339		1468863	1		734363			0.354965
146989	1		734863	267		1469863	45		734863			0.355964
147089	2		735363	370		1470863	48		735363			0.358664
147189	1		735863	1		1471863	4		735863			0.361864
147289	0		736363	1		1472863	3		736363			0.362964
147389	1		736863	2		1473863	3		736863			0.359864
147489	1		737363	1		1474863	2		737363			0.365363
147589	0		737863	1		1475863	2		737863			0.368963
147689	0		738363	1		1476863	4		738363			0.371663
147789	0		738863	1		1477863	63		738863			0.371663
147889	0		739363	0		1478863	54		739363	1		0.370863
147989	2		739863	2		1479863	1		739863			0.372163
148089	2		740363	3		1480863	11		740363			0.375562
148189	0		740863	1		1481863	2		740863			0.377962
148289	0		741363	0		1482863	2		741363	1		0.381062
148389	2		741863	0		1483863	2		741863	1		0.382562
148489	2		742363	4		1484863	2		742363			0.384262
148589	0		742863	3		1485863	18		742863			0.384262
148689	0		743363	8		1486863	12		743363			0.384962
148789	1		743863	8		1487863	4		743863			0.388561
148889	1		744363	0		1488863	244		744363	1		0.394061
148989	3		744863	5		1489863	138		744863			0.392061
149089	3		745363	3		1490863	9		745363			0.387361
149189	3		745863	3		1491863	14		745863			0.382662
149289	0		746363	0		1492863	5		746363	1		0.380162
149389	0		746863	0		1493863	5		746863	1		0.382162
149489	0		747363	1		1494863	11		747363			0.380562
149589	1		747863	0		1495863	1		747863	1		0.380462
149689	2		748363	1		1496863	3		748363			0.382162
149789	3		748863	1		1497863	9		748863			0.380862
149889	3		749363	5		1498863	11		749363			0.380062
149989	0		749863	5		1499863	12		749863			0.377562
150089	0		750363	34		1500863	8		750363			0.373063
150189	12		750863	36		1501863	2		750863			0.366363
150289	13		751363	26		1502863	1		751363			0.363264
150389	12		751863	1		1503863	1		751863			0.359764
150489	1		752363	4		1504863	0		752363			0.360064
150589	1		752863	0		1505863	193		752863	1		0.358764
150689	1		753363	6		1506863	147		753363			0.355864
150789	1		753863	40		1507863	22		753863			0.351165
150889	1		754363	44		1508863	22		754363			0.351065
150989	1		754863	44		1509863	11		754863			0.357364
151089	1		755363	1		1510863	14		755363			0.361764
151189	1		755863	1		1511863	9		755863			0.362064
151289	1		756363	1		1512863	9		756363			0.360664
151389	3		756863	0		1513863	22		756863	1		0.357264
151489	5		757363	0		1514863	5		757363	1		0.357264
151589	4		757863	0		1515863	9		757863	1		0.355364
151689	0		758363	1		1516863	35		758363			0.352465
151789	0		758863	1		1517863	61		758863			0.351365
151889	0		759363	3		1518863	11		759363			0.352665
151989	0		759863	1		1519863	9		759863			0.355564
152089	0		760363	0		1520863	10		760363	1		0.358264
152189	0		760863	0		1521863	30		760863	1		0.362064
152289	5		761363	0		1522863	21		761363	1		0.361764
152389	6		761863	3		1523863	87		761863			0.363064
152489	6		762363	0		1524863	51		762363	1		0.358264
152589	6		762863	0		1525863	118		762863	1		0.357864
152689	0		763363	4		1526863	53		763363			0.361364
152789	0		763863	1		1527863	15		763863			0.363464
152889	0		764363	0		1528863	7		764363	1		0.357564
152989	0		764863	25		1529863	6		764863			0.353565
153089	1		765363	25		1530863	19		765363			0.350165
153189	1		765863	1		1531863	9		765863			0.350065
153289	1		766363	2		1532863	4		766363			0.352465
153389	0		766863	3		1533863	32		766863			0.356364
153489	0		767363	1		1534863	31		767363			0.360364
153589	0		767863	2		1535863	9		767863			0.363064
153689	9		768363	47		1536863	2		768363			0.366063
153789	9		768863	11		1537863	36		768863			0.365463
153889	1		769363	39		1538863	46		769363			0.369663
153989	1		769863	37		1539863	45		769863			0.370663
154089	0		770363	0		1540863	8		770363	1		0.370063
154189	0		770863	1		1541863	0		770863			0.369863
154289	0		771363	1		1542863	11		771363			0.369463
154389	0		771863	1		1543863	14		771863			0.367663
154489	0		772363	1		1544863	4		772363			0.369963
154589	0		772863	0		1545863	5		772863	1		0.372863
154689	0		773363	3		1546863	14		773363			0.368863
154789	0		773863	1		1547863	2		773863			0.371263
154889	0		774363	26		1548863	2		774363			0.376562
154989	0		774863	2		1549863	28		774863			0.377162
155089	0		775363	26		1550863	28		775363			0.379762
155189	0		775863	0		1551863	55		775863	1		0.381262
155289	3		776363	1		1552863	1		776363			0.379562
155389	3		776863	0		1553863	1		776863	1		0.380962
155489	0		777363	5		1554863	3		777363			0.377462
155589	13		777863	6		1555863	15		777863			0.375362
155689	13		778363	359		1556863	21		778363			0.370663
155789	0		778863	112		1557863	2		778863			0.371063
155889	4		779363	7		1558863	29		779363			0.366963
155989	4		779863	547		1559863	444		779863			0.364864
156089	9		780363	39		1560863	51		780363			0.363264
156189	10		780863	1		1561863	1		780863			0.363464
156289	7		781363	1		1562863	839		781363			0.363364
156389	0		781863	0		1563863	764		781863	1		0.367263
156489	3		782363	1		1564863	17		782363			0.368163
156589	4		782863	1		1565863	6		782863			0.367363
156689	4		783363	2		1566863	17		783363			0.370663
156789	2		783863	0		1567863	53		783863	1		0.372263
156889	2		784363	0		1568863	3		784363	1		0.370663
156989	2		784863	0		1569863	3		784863	1		0.370463
157089	2		785363	0		1570863	36		785363	1		0.366963
157189	2		785863	0		1571863	67		785863	1		0.367163
157289	1		786363	15		1572863	3		786363			0.372463
157389	1		786863	2		1573863	0		786863			0.367063
157489	2		787363	6		1574863	7		787363			0.368363
157589	2		787863	6		1575863	20		787863			0.368163
157689	4		788363	1		1576863	2		788363			0.370963
157789	3		788863	1		1577863	1		788863			0.368263
157889	2		789363	1		1578863	0		789363			0.370463
157989	2		789863	0		1579863	1		789863	1		0.372763
158089	1		790363	0		1580863	7		790363	1		0.373163
158189	0		790863	2		1581863	8		790863			0.375662
158289	1		791363	3		1582863	4		791363			0.379862
158389	0		791863	0		1583863	4		791863	1		0.379162
158489	0		792363	0		1584863	4		792363	1		0.379562
158589	2		792863	2		1585863	3		792863			0.377862
158689	9		793363	9		1586863	6		793363			0.377162
158789	9		793863	8		1587863	7		793863			0.374963
158889	2		794363	11		1588863	222		794363			0.375362
158989	0		794863	7		1589863	253		794863			0.374463
159089	0		795363	4		1590863	3		795363			0.376662
159189	3		795863	0		1591863	1		795863	1		0.375262
159289	5		796363	5		1592863	1		796363			0.369263
159389	5		796863	3		1593863	188		796863			0.374163
159489	2		797363	7		1594863	319		797363			0.374663
159589	2		797863	0		1595863	2		797863	1		0.373563
159689	0		798363	0		1596863	4		798363	1		0.374263
159789	0		798863	4		1597863	2		798863			0.374563
159889	0		799363	7		1598863	5		799363			0.376162
159989	0		799863	6		1599863	2		799863			0.373163
160089	0		800363	6		1600863	4		800363			0.372863
160189	0		800863	0		1601863	10		800863	1		0.369263
160289	0		801363	3		1602863	30		801363			0.367763
160389	0		801863	4		1603863	54		801863			0.367163
160489	0		802363	1		1604863	25		802363			0.368763
160589	0		802863	4		1605863	2		802863			0.366663
160689	0		803363	0		1606863	0		803363	1		0.369863
160789	0		803863	1		1607863	1		803863			0.368063
160889	0		804363	0		1608863	0		804363	1		0.365563
160989	0		804863	0		1609863	10		804863	1		0.362164
161089	0		805363	0		1610863	9		805363	1		0.363964
161189	0		805863	0		1611863	108		805863	1		0.364964
161289	0		806363	2		1612863	106		806363			0.363864
161389	0		806863	4		1613863	15		806863			0.363064
161489	0		807363	0		1614863	13		807363	1		0.362664
161589	0		807863	0		1615863	2		807863	1		0.363664
161689	0		808363	7		1616863	4		808363			0.364064
161789	0		808863	1		1617863	6		808863			0.367663
161889	0		809363	1		1618863	0		809363			0.363964
161989	0		809863	0		1619863	9		809863	1		0.365563
162089	0		810363	0		1620863	27		810363	1		0.367563
162189	0		810863	0		1621863	35		810863	1		0.370563
162289	0		811363	6		1622863	0		811363			0.368963
162389	0		811863	2		1623863	4		811863			0.371363
162489	0		812363	1		1624863	3		812363			0.371763
162589	0		812863	2		1625863	4		812863			0.375962
162689	0		813363	3		1626863	0		813363			0.374563
162789	0		813863	2		1627863	2		813863			0.375062
162889	0		814363	33		1628863	2		814363			0.373263
162989	1		814863	32		1629863	952		814863			0.376862
163089	1		815363	35		1630863	350		815363			0.372263
163189	3		815863	19		1631863	1672		815863			0.373663
163289	2		816363	8		1632863	1		816363			0.378462
163389	0		816863	8		1633863	1		816863			0.377862
163489	0		817363	12		1634863	0		817363			0.375762
163589	0		817863	2		1635863	1		817863			0.376162
163689	0		818363	1		1636863	1		818363			0.376462
163789	0		818863	0		1637863	2		818863	1		0.375262
163889	0		819363	1		1638863	0		819363			0.374763
163989	0		819863	0		1639863	2		819863	1		0.373763
164089	0		820363	0		1640863	6		820363	1		0.373363
164189	0		820863	0		1641863	38		820863	1		0.374363
164289	0		821363	1		1642863	38		821363			0.374363
164389	0		821863	0		1643863	17		821863	1		0.372763
164489	0		822363	1		1644863	8		822363			0.370763
164589	0		822863	0		1645863	5		822863	1		0.368263
164689	0		823363	0		1646863	1		823363	1		0.366163
164789	0		823863	0		1647863	0		823863	1		0.365263
164889	0		824363	0		1648863	0		824363	1		0.369363
164989	2		824863	1		1649863	3		824863			0.365463
165089	2		825363	0		1650863	62		825363	1		0.370963
165189	2		825863	0		1651863	39		825863	1		0.366963
165289	0		826363	0		1652863	55		826363	1		0.363464
165389	0		826863	0		1653863	22		826863	1		0.363264
165489	1		827363	1		1654863	274		827363			0.363664
165589	1		827863	0		1655863	226		827863	1		0.361864
165689	2		828363	0		1656863	0		828363	1		0.361564
165789	2		828863	0		1657863	0		828863	1		0.363164
165889	1		829363	0		1658863	2		829363	1		0.362064
165989	1		829863	36		1659863	2		829863			0.361064
166089	0		830363	8		1660863	3		830363			0.360864
166189	0		830863	162		1661863	1		830863			0.359464
166289	3		831363	60		1662863	2		831363			0.358464
166389	3		831863	102		1663863	2		831863			0.352465
166489	0		832363	0		1664863	1		832363	1		0.348465
166589	6		832863	1		1665863	17		832863			0.342466
166689	6		833363	1		1666863	5		833363			0.340966
166789	4		833863	3		1667863	0		833863			0.344566
166889	2		834363	1		1668863	1		834363			0.343666
166989	0		834863	2		1669863	6		834863			0.346865
167089	0		835363	8		1670863	16		835363			0.345465
167189	0		835863	23		1671863	10		835863			0.348865
167289	0		836363	0		1672863	36		836363	1		0.352365
167389	0		836863	0		1673863	1		836863	1		0.352365
167489	1		837363	0		1674863	1		837363	1		0.353065
167589	1		837863	0		1675863	8		837863	1		0.354765
167689	0		838363	0		1676863	2		838363	1		0.355364
167789	1		838863	0		1677863	10		838863	1		0.356264
167889	1		839363	0		1678863	9		839363	1		0.361564
167989	1		839863	1		1679863	2		839863			0.367263
168089	0		840363	0		1680863	2		840363	1		0.366363
168189	0		840863	0		1681863	1		840863	1		0.366163
168289	0		841363	2		1682863	2		841363			0.368863
168389	0		841863	1		1683863	1		841863			0.371363
168489	0		842363	5		1684863	1		842363			0.378962
168589	0		842863	3		1685863	1		842863			0.388661
168689	0		843363	3		1686863	6		843363			0.392461
168789	0		843863	2		1687863	7		843863			0.391861
168889	0		844363	7		1688863	3		844363			0.391661
168989	0		844863	3		1689863	6		844863			0.391561
169089	0		845363	3		1690863	8		845363			0.393561
169189	1		845863	2		1691863	36		845863			0.39556
169289	1		846363	4		1692863	17		846363			0.39626
169389	1		846863	4		1693863	49		846863			0.392561
169489	0		847363	38		1694863	7		847363			0.392461
169589	0		847863	4		1695863	35		847863			0.392361
169689	0		848363	2		1696863	20		848363			0.392261
169789	0		848863	3		1697863	3		848863			0.391461
169889	0		849363	12		1698863	0		849363			0.390161
169989	0		849863	18		1699863	2		849863			0.384962
170089	0		850363	32		1700863	3		850363			0.387161
170189	0		850863	41		1701863	6		850863			0.389361
170289	0		851363	9		1702863	0		851363			0.392361
170389	0		851863	4		1703863	2		851863			0.39766
170489	0		852363	330		1704863	0		852363			0.39526
170589	0		852863	348		1705863	2		852863			0.39526
170689	1		853363	363		1706863	2		853363			0.39546
170789	1		853863	363		1707863	1		853863			0.394261
170889	0		854363	2		1708863	2		854363			0.39646
170989	0		854863	7		1709863	2506		854863			0.39846
171089	0		855363	73		1710863	1978		855363			0.39706
171189	0		855863	82		1711863	13		855863			0.39756
171289	0		856363	4		1712863	21		856363			0.39996
171389	0		856863	22		1713863	0		856863			0.407459
171489	0		857363	27		1714863	0		857363			0.409359
171589	0		857863	16		1715863	2		857863			0.410759
171689	0		858363	21		1716863	4		858363			0.411359
171789	0		858863	26		1717863	7		858863			0.411459
171889	0		859363	140		1718863	0		859363			0.408359
171989	0		859863	8		1719863	14		859863			0.411559
172089	0		860363	44		1720863	14		860363			0.406659
172189	0		860863	7		1721863	11		860863			0.40226
172289	0		861363	14		1722863	479		861363			0.39786
172389	0		861863	6		1723863	380		861863			0.393161
172489	0		862363	8		1724863	0		862363			0.393061
172589	0		862863	9		1725863	44		862863			0.390861
172689	0		863363	16		1726863	52		863363			0.387061
172789	0		863863	11		1727863	2		863863			0.386061
172889	0		864363	1		1728863	18		864363			0.385361
172989	1		864863	1		1729863	9		864863			0.384862
173089	1		865363	0		1730863	6		865363	1		0.384262
173189	0		865863	5		1731863	13		865863			0.382562
173289	0		866363	7		1732863	4		866363			0.380162
173389	0		866863	1		1733863	6		866863			0.377762
173489	0		867363	12		1734863	4		867363			0.376262
173589	0		867863	1		1735863	1		867863			0.375062
173689	10		868363	0		1736863	1		868363	1		0.373963
173789	10		868863	4		1737863	1		868863			0.370063
173889	0		869363	2		1738863	5		869363			0.372163
173989	0		869863	10		1739863	7		869863			0.370763
174089	0		870363	2		1740863	3701		870363			0.376862
174189	0		870863	3		1741863	1206		870863			0.378562
174289	0		871363	3		1742863	2349		871363			0.377062
174389	0		871863	5		1743863	4		871863			0.381862
174489	0		872363	3		1744863	4		872363			0.378262
174589	0		872863	4		1745863	5		872863			0.375462
174689	0		873363	1		1746863	1		873363			0.374663
174789	3		873863	4		1747863	2		873863			0.376562
174889	3		874363	4		1748863	38		874363			0.376562
174989	0		874863	6		1749863	16		874863			0.375762
175089	0		875363	8		1750863	9		875363			0.372663
175189	0		875863	10		1751863	3		875863			0.373663
175289	0		876363	5		1752863	8		876363			0.372163
175389	0		876863	5		1753863	79		876863			0.373263
175489	0		877363	0		1754863	92		877363	1		0.374163
175589	0		877863	0		1755863	1		877863	1		0.373363
175689	0		878363	1		1756863	11		878363			0.373563
175789	1		878863	3		1757863	6		878863			0.376762
175889	1		879363	4		1758863	7		879363			0.377062
175989	0		879863	2		1759863	3		879863			0.378462
176089	0		880363	2		1760863	3		880363			0.379162
176189	0		880863	3		1761863	0		880863			0.381962
176289	0		881363	2		1762863	0		881363			0.386061
176389	0		881863	1		1763863	21		881863			0.380962
176489	1		882363	1		1764863	174		882363			0.380962
176589	7		882863	5		1765863	93		882863			0.384562
176689	6		883363	2		1766863	90		883363			0.394761
176789	2		883863	4		1767863	1		883863			0.40066
176889	2		884363	5		1768863	0		884363			0.407159
176989	2		884863	16		1769863	6		884863			0.405559
177089	3		885363	79		1770863	6		885363			0.410759
177189	3		885863	3		1771863	104		885863			0.413559
177289	1		886363	67		1772863	48		886363			0.419558
177389	0		886863	0		1773863	47		886863	1		0.420958
177489	0		887363	2		1774863	4		887363			0.426257
177589	2		887863	4		1775863	1		887863			0.434757
177689	10		888363	0		1776863	0		888363	1		0.436956
177789	9		888863	0		1777863	1		888863	1		0.435756
177889	1		889363	1		1778863	11		889363			0.435056
177989	9		889863	9		1779863	3		889863			0.433957
178089	9		890363	9		1780863	14		890363			0.432657
178189	1		890863	0		1781863	10		890863	1		0.427357
178289	0		891363	0		1782863	3		891363	1		0.426257
178389	0		891863	0		1783863	0		891863	1		0.430357
178489	6		892363	0		1784863	7		892363	1		0.433857
178589	14		892863	0		1785863	51		892863	1		0.431757
178689	15		893363	0		1786863	2		893363	1		0.425557
178789	11		893863	0		1787863	1		893863	1		0.421058
178889	3		894363	0		1788863	16		894363	1		0.412159
178989	5		894863	0		1789863	7		894863	1		0.412759
179089	4		895363	1		1790863	9		895363			0.409359
179189	1		895863	1		1791863	4		895863			0.40496
179289	2		896363	2		1792863	9		896363			0.39826
179389	3		896863	1		1793863	177		896863			0.392561
179489	2		897363	3		1794863	65		897363			0.386861
179589	0		897863	2		1795863	4		897863			0.381462
179689	0		898363	2		1796863	7		898363			0.379762
179789	0		898863	0		1797863	231		898863	1		0.378562
179889	0		899363	1		1798863	152		899363			0.377162
179989	3		899863	0		1799863	23		899863	1		0.378162
180089	3		900363	1		1800863	0		900363			0.376362
180189	3		900863	0		1801863	0		900863	1		0.378162
180289	15		901363	1		1802863	65		901363			0.378562
180389	18		901863	1		1803863	7		901863			0.374663
180489	17		902363	1		1804863	57		902363			0.371463
180589	0		902863	0		1805863	3		902863	1		0.373063
180689	0		903363	0		1806863	203		903363	1		0.376162
180789	17		903863	1		1807863	14		903863			0.374163
180889	18		904363	2		1808863	5		904363			0.373163
180989	0		904863	1		1809863	6		904863			0.372363
181089	0		905363	0		1810863	0		905363	1		0.372063
181189	0		905863	0		1811863	2		905863	1		0.368963
181289	2		906363	0		1812863	1		906363	1		0.369863
181389	2		906863	0		1813863	19		906863	1		0.369863
181489	2		907363	1		1814863	48		907363			0.367363
181589	2		907863	0		1815863	74		907863	1		0.362964
181689	1		908363	1		1816863	1		908363			0.362364
181789	1		908863	0		1817863	1		908863	1		0.361964
181889	1		909363	1		1818863	1		909363			0.362764
181989	1		909863	1		1819863	1		909863			0.362164
182089	1		910363	28		1820863	4		910363			0.360364
182189	0		910863	28		1821863	0		910863			0.361064
182289	0		911363	14		1822863	2		911363			0.362464
182389	2		911863	4		1823863	6		911863			0.366563
182489	2		912363	0		1824863	6		912363	1		0.371563
182589	2		912863	1		1825863	8		912863			0.369263
182689	1		913363	1		1826863	8		913363			0.364964
182789	2		913863	1		1827863	2		913863			0.364764
182889	1		914363	3		1828863	0		914363			0.368563
182989	0		914863	1		1829863	2		914863			0.371163
183089	2		915363	1		1830863	6		915363			0.374663
183189	2		915863	3		1831863	4		915863			0.379262
183289	4		916363	6		1832863	2		916363			0.380962
183389	4		916863	11		1833863	10		916863			0.382962
183489	0		917363	20		1834863	1		917363			0.383362
183589	0		917863	4		1835863	7		917863			0.385161
183689	0		918363	2		1836863	8		918363			0.387361
183789	3		918863	2		1837863	15		918863			0.388261
183889	3		919363	7		1838863	14		919363			0.387761
183989	1		919863	3		1839863	14		919863			0.385661
184089	1		920363	6		1840863	8		920363			0.385861
184189	0		920863	1		1841863	41		920863			0.383962
184289	0		921363	15		1842863	29		921363			0.380862
184389	1		921863	2		1843863	6		921863			0.377462
184489	1		922363	1		1844863	269		922363			0.377162
184589	1		922863	5		1845863	100		922863			0.381862
184689	2		923363	1		1846863	110		923363			0.381862
184789	2		923863	4		1847863	39		923863			0.381362
184889	0		924363	3		1848863	39		924363			0.377362
184989	0		924863	3		1849863	1		924863			0.375762
185089	0		925363	2		1850863	5		925363			0.372663
185189	1		925863	0		1851863	2		925863	1		0.367663
185289	1		926363	0		1852863	7		926363	1		0.367063
185389	0		926863	3		1853863	0		926863			0.368763
185489	0		927363	10		1854863	0		927363			0.370463
185589	0		927863	6		1855863	0		927863			0.369863
185689	0		928363	35		1856863	1		928363			0.370263
185789	3		928863	35		1857863	1		928863			0.372563
185889	3		929363	0		1858863	1		929363	1		0.373063
185989	1		929863	0		1859863	2		929863	1		0.372063
186089	1		930363	3		1860863	4		930363			0.372663
186189	0		930863	0		1861863	11		930863	1		0.378962
186289	1		931363	2		1862863	2		931363			0.380162
186389	1		931863	2		1863863	19		931863			0.381562
186489	1		932363	2		1864863	9		932363			0.379062
186589	1		932863	2		1865863	1		932863			0.373163
186689	1		933363	2		1866863	7		933363			0.373663
186789	0		933863	1		1867863	4		933863			0.373563
186889	0		934363	0		1868863	4		934363	1		0.375262
186989	1		934863	1		1869863	14		934863			0.376262
187089	0		935363	0		1870863	25		935363	1		0.378962
187189	0		935863	9		1871863	44		935863			0.381462
187289	0		936363	5		1872863	0		936363			0.376662
187389	0		936863	1		1873863	0		936863			0.370463
187489	1		937363	3		1874863	86		937363			0.366163
187589	1		937863	0		1875863	71		937863	1		0.361964
187689	1		938363	1		1876863	69		938363			0.354765
187789	1		938863	1		1877863	0		938863			0.355864
187889	1		939363	1		1878863	1		939363			0.358464
187989	1		939863	3		1879863	2		939863			0.362064
188089	0		940363	1		1880863	3		940363			0.364964
188189	0		940863	3		1881863	2		940863			0.363464
188289	0		941363	3		1882863	28		941363			0.361964
188389	3		941863	1		1883863	43		941863			0.361564
188489	21		942363	1		1884863	2		942363			0.362564
188589	18		942863	0		1885863	0		942863	1		0.366863
188689	1		943363	0		1886863	85		943363	1		0.365963
188789	1		943863	1		1887863	180		943863			0.367763
188889	15		944363	1		1888863	224		944363			0.376962
188989	15		944863	0		1889863	15		944863	1		0.374663
189089	31		945363	1		1890863	250		945363			0.369663
189189	31		945863	5		1891863	54		945863			0.371563
189289	21		946363	903		1892863	4		946363			0.376762
189389	20		946863	7024		1893863	86		946863			0.379362
189489	21		947363	9390		1894863	54		947363			0.383562
189589	16		947863	9520		1895863	16		947863			0.386061
189689	16		948363	9845		1896863	55		948363			0.387161
189789	18		948863	1		1897863	10		948863			0.378862
189889	2		949363	5		1898863	13		949363			0.374463
189989	0		949863	2		1899863	834		949863			0.375562
190089	0		950363	4		1900863	457		950363			0.373663
190189	26		950863	5		1901863	259		950863			0.373163
190289	26		951363	2		1902863	0		951363			0.375062
190389	0		951863	0		1903863	6		951863	1		0.371863
190489	0		952363	2		1904863	6		952363			0.372563
190589	0		952863	0		1905863	4		952863	1		0.370563
190689	0		953363	1		1906863	3		953363			0.368363
190789	8		953863	0		1907863	2		953863	1		0.363764
190889	12		954363	3		1908863	4		954363			0.350365
190989	9		954863	4		1909863	8		954863			0.349465
191089	1		955363	0		1910863	8		955363	1		0.350065
191189	1		955863	3		1911863	0		955863			0.351965
191289	0		956363	5		1912863	0		956363			0.351265
191389	0		956863	12		1913863	1		956863			0.352865
191489	0		957363	1		1914863	1		957363			0.348965
191589	0		957863	0		1915863	0		957863	1		0.349865
191689	0		958363	0		1916863	0		958363	1		0.352565
191789	0		958863	0		1917863	3		958863	1		0.361064
191889	0		959363	0		1918863	3		959363	1		0.361164
191989	1		959863	0		1919863	0		959863	1		0.357764
192089	1		960363	15		1920863	4		960363			0.356664
192189	0		960863	5		1921863	3		960863			0.353265
192289	0		961363	0		1922863	0		961363	1		0.350865
192389	0		961863	0		1923863	0		961863	1		0.353765
192489	0		962363	18		1924863	5		962363			0.346665
192589	0		962863	21		1925863	3		962863			0.343866
192689	1		963363	35		1926863	7		963363			0.344966
192789	1		963863	2		1927863	2		963863			0.342266
192889	0		964363	5		1928863	4		964363			0.347765
192989	0		964863	2		1929863	1		964863			0.349265
193089	0		965363	0		1930863	1		965363	1		0.352165
193189	0		965863	0		1931863	1		965863	1		0.346665
193289	0		966363	0		1932863	3		966363	1		0.343966
193389	0		966863	0		1933863	7		966863	1		0.343166
193489	0		967363	2		1934863	0		967363			0.348865
193589	0		967863	2		1935863	3		967863			0.351665
193689	0		968363	0		1936863	0		968363	1		0.351965
193789	0		968863	0		1937863	0		968863	1		0.347765
193889	4		969363	71		1938863	0		969363			0.350065
193989	5		969863	23		1939863	1		969863			0.351065
194089	4		970363	22		1940863	1		970363			0.352965
194189	0		970863	45		1941863	3		970863			0.353165
194289	1		971363	1		1942863	2		971363			0.355264
194389	1		971863	0		1943863	3		971863	1		0.357264
194489	0		972363	10		1944863	3		972363			0.361764
194589	0		972863	7		1945863	1		972863			0.369163
194689	0		973363	1		1946863	0		973363			0.374863
194789	0		973863	31		1947863	14		973863			0.380462
194889	0		974363	53		1948863	12		974363			0.379062
194989	2		974863	2		1949863	0		974863			0.379262
195089	4		975363	60		1950863	4		975363			0.378462
195189	3		975863	0		1951863	4		975863	1		0.382462
195289	2		976363	10		1952863	4		976363			0.386661
195389	3		976863	2		1953863	0		976863			0.389761
195489	3		977363	183		1954863	0		977363			0.388061
195589	0		977863	156		1955863	1		977863			0.390861
195689	0		978363	20		1956863	1		978363			0.393661
195789	0		978863	2		1957863	9		978863			0.39696
195889	0		979363	2		1958863	3		979363			0.39786
195989	1		979863	0		1959863	1		979863	1		0.39976
196089	1		980363	1		1960863	1		980363			0.40006
196189	0		980863	2		1961863	0		980863			0.40316
196289	0		981363	13		1962863	0		981363			0.40476
196389	0		981863	9		1963863	0		981863			0.40466
196489	0		982363	41		1964863	0		982363			0.408659
196589	0		982863	92		1965863	2		982863			0.407059
196689	0		983363	4		1966863	5		983363			0.406359
196789	0		983863	88		1967863	19		983863			0.408659
196889	0		984363	88		1968863	22		984363			0.410959
196989	0		984863	5		1969863	3		984863			0.414559
197089	0		985363	6		1970863	4		985363			0.416658
197189	0		985863	8		1971863	3		985863			0.416058
197289	0		986363	1		1972863	1		986363			0.414059
197389	1		986863	5		1973863	0		986863			0.413259
197489	1		987363	5		1974863	1		987363			0.413559
197589	0		987863	8		1975863	0		987863			0.415058
197689	1		988363	10		1976863	3		988363			0.415258
197789	1		988863	3		1977863	3		988863			0.414059
197889	0		989363	1		1978863	3		989363			0.415558
197989	1		989863	1		1979863	0		989863			0.415858
198089	1		990363	0		1980863	2		990363	1		0.416358
198189	0		990863	0		1981863	1		990863	1		0.414759
198289	5		991363	13		1982863	0		991363			0.415658
198389	4		991863	9		1983863	10		991863			0.415058
198489	0		992363	29		1984863	2		992363			0.416758
198589	0		992863	6		1985863	0		992863			0.417658
198689	1		993363	3		1986863	19		993363			0.417658
198789	1		993863	2		1987863	363		993863			0.416458
198889	1		994363	3		1988863	312		994363			0.414859
198989	0		994863	6		1989863	22		994863			0.415058
199089	2		995363	6		1990863	39		995363			0.415058
199189	2		995863	29		1991863	23		995863			0.415858
199289	0		996363	9		1992863	3		996363			0.417958
199389	0		996863	17		1993863	4		996863			0.420058
199489	0		997363	26		1994863	11		997363			0.422158
199589	0		997863	23		1995863	16		997863			0.417558
199689	0		998363	4		1996863	4		998363			0.415658
[truncated: 38,685 more rows]

## Sheet: Figure S1
	Figure S1. DOP-PCR library coverage of the C. cellulolyticum genome when constructed using 4 different DOP primers (labeled). Sequencing results are given in Supplementary Appendix 2.
